# Supplementary material for: DNA methylation determines nucleosome occupancy in the 5′-CpG islands of tumor suppressor genes
Source: PubMed Central journal article supplement — Oncogene. 2013 May 20;32(47):5421–8. doi: 10.1038/onc.2013.162 (PMC3898323; doi:10.1038/onc.2013.162), 2013-05-20
Supplement: onc2013162x1.pdf [file onc2013162x1.pdf]

**Supplementary data to:**

**DNA methylation determines nucleosome occupancy in the 5'-CpG islands of tumor suppressor genes**

Anna Portela, Julia Liz, Vanesa Nogales, Fernando Setién, Alberto Villanueva, Manel Esteller

\* Supplementary Figures S1-S14

\* Supplementary Tables S1 & S2

\* Supplementary Methods

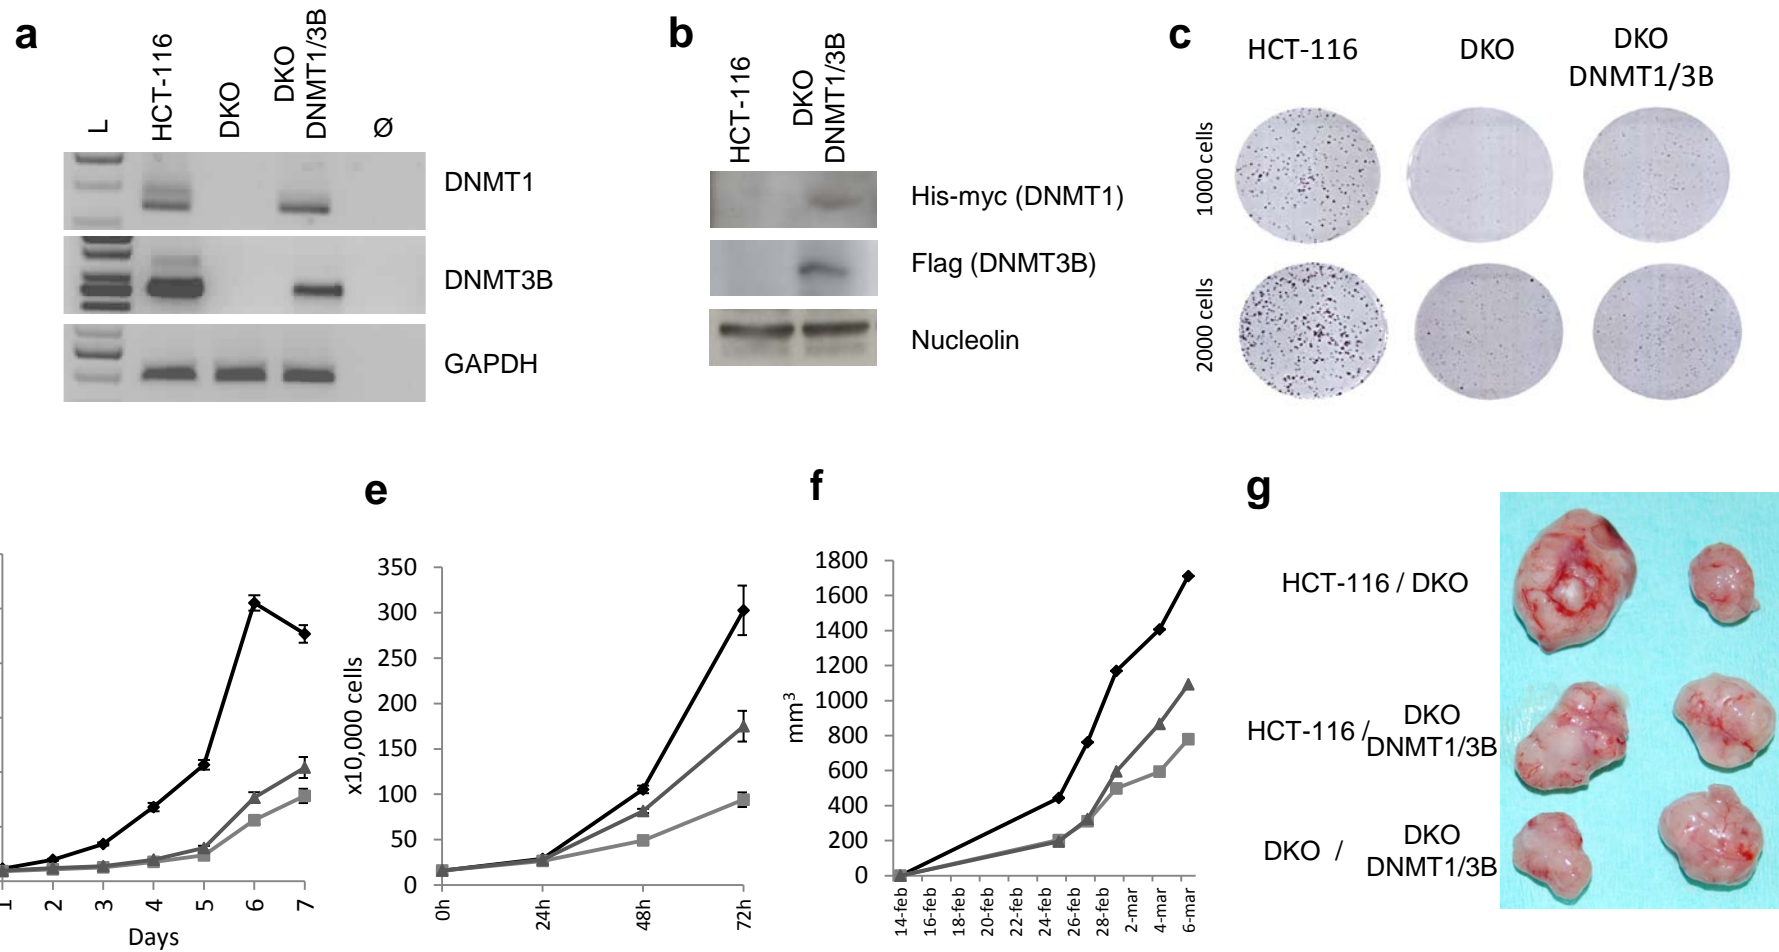

**Supplementary Figure S1.** Reintroduction of DNMT1 and DNMT3B into the DKO cell line. (a) RT-PCR in the DKO, DKO DNMT1/3B and HCT-116 cell line. *GAPDH* is used as a control. DNMT1 and DNMT3B are not present in the DKO cell line. In the HCT-116 cell lines different bands corresponding to different isoforms appear. However in the DKO DNMT1/3B just one band appears corresponding to the reintroduced isoform. Primers used are shown in Table I. L lane is the ladder. (b) Western blot in the DKO and DKO DNMT1/3B cell lines. Nucleolin was used as a control. Since the reintroduced DNMT1 and DNMT3B were marked with Flag and His-myc tags respectively, these antibodies were used in the Western. Again, DNMT1 and DNMT3B are present in the DKO DNMT1/3B cell line but not in the DKO. (c) Colony formation assay plating 1,000 cells and 2,000 cells. (d) Cell viability determined by the 3-(4, 5-dimethyl-2-thiazolyl)-2, 5-diphenyl-2H-tetrazolium bromide (MTT) assay. (e) Doubling time assay. The calculated doubling time is 14.95 hours for HCT-116, 26.01 hours for DKO and 19.92 hours for DKO DNMT1/3B. (f) In vivo nude mouse tumor-growth assay. Tumor volume were measured using digital calipers. Tumor volume (in mm<sup>3</sup>) was estimated according to the formula  $V = D \times d^2 / 2$ , where  $D$  is the long axis and  $d$  the short axis of tumor. Graphs (d), (e) and (f) legends: HCT-116 black rhombus, DKO light grey squares, and DKO DNMT1/3B dark grey triangles. (g) Representative tumors of nude mice 21 days after injection of  $3.5 \times 10^6$  cells.

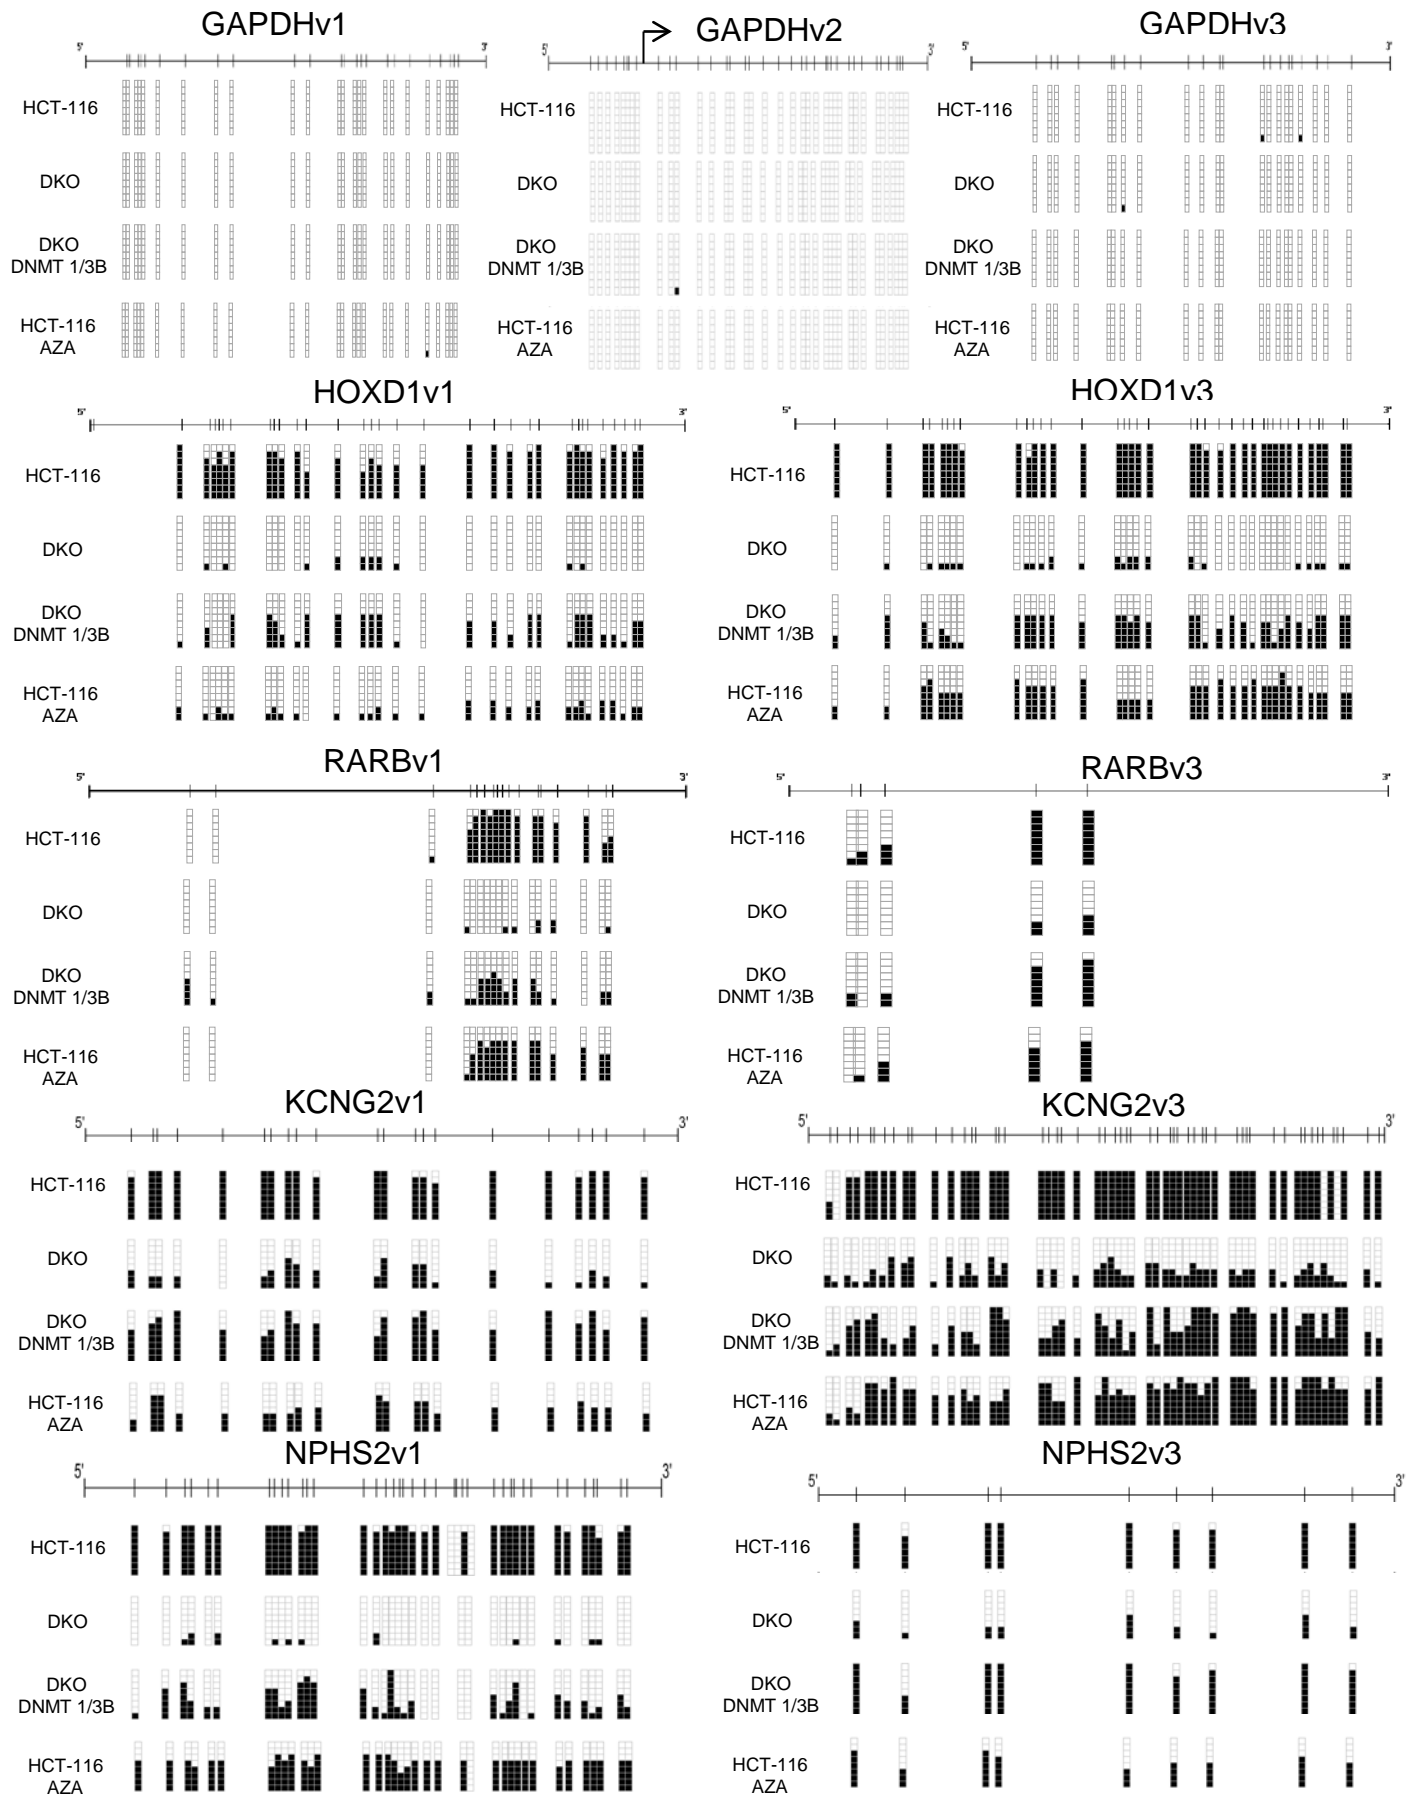

**Supplementary Figure S2.** DNA methylation patterns. Bisulfite sequencing of eight clones for each cell line/treatment studied. The regions presented in this figure are the ones not corresponding to the TSS, except for *GAPDH*. Region version 1 (v1) is the one located upstream the TSS, while version 3 (v3) is the one located downstream the TSS. White squares represent unmethylated CpG, while black ones represent methylated CpG.

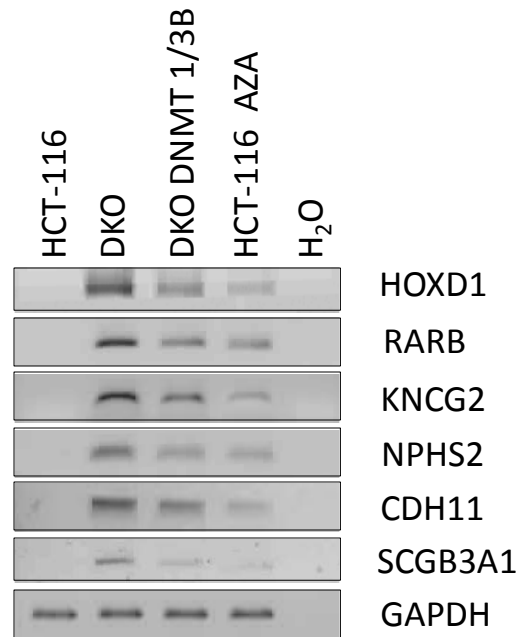

**Supplementary Figure S3.** Semi-quantitative PCR assessing gene expression. Expression of *HOXD1*, *RARB*, *KCNG2*, *NPHS2*, *CDH11* and *SCGB3A1* is shown for all the cell lines and cases studied. *GAPDH* expression, which is constitutive in all cell lines, was used as a control.

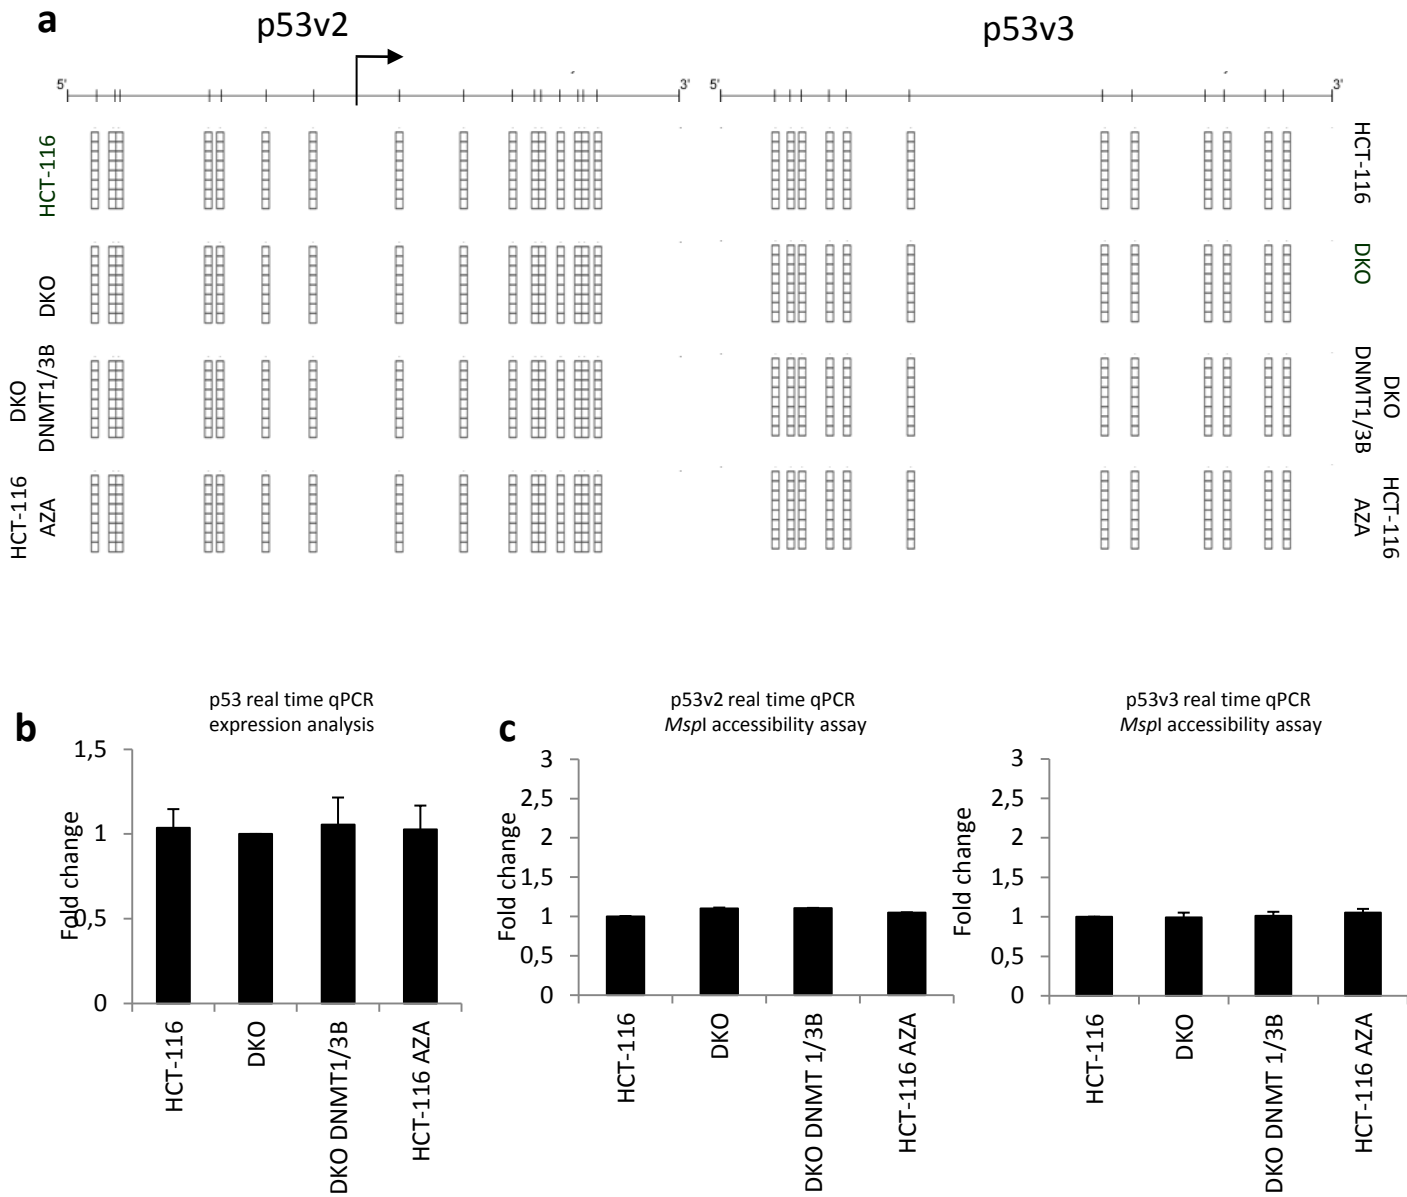

**Supplementary Figure S4.** *p53* gene promoter analysis for DNA methylation, RNA expression and nucleosome occupancy. (a) DNA methylation. Bisulfite sequencing of eight clones for each cell line/treatment studied. White squares represent unmethylated CpG, while black ones represent methylated CpG. (b) Gene expression. *GAPDH* expression, that is constitutive in all cell lines, was used to normalize the data. (c) *MspI* accessibility assay. The results are depicted as the fold change between undigested DNA and 400U/mL digested DNA.

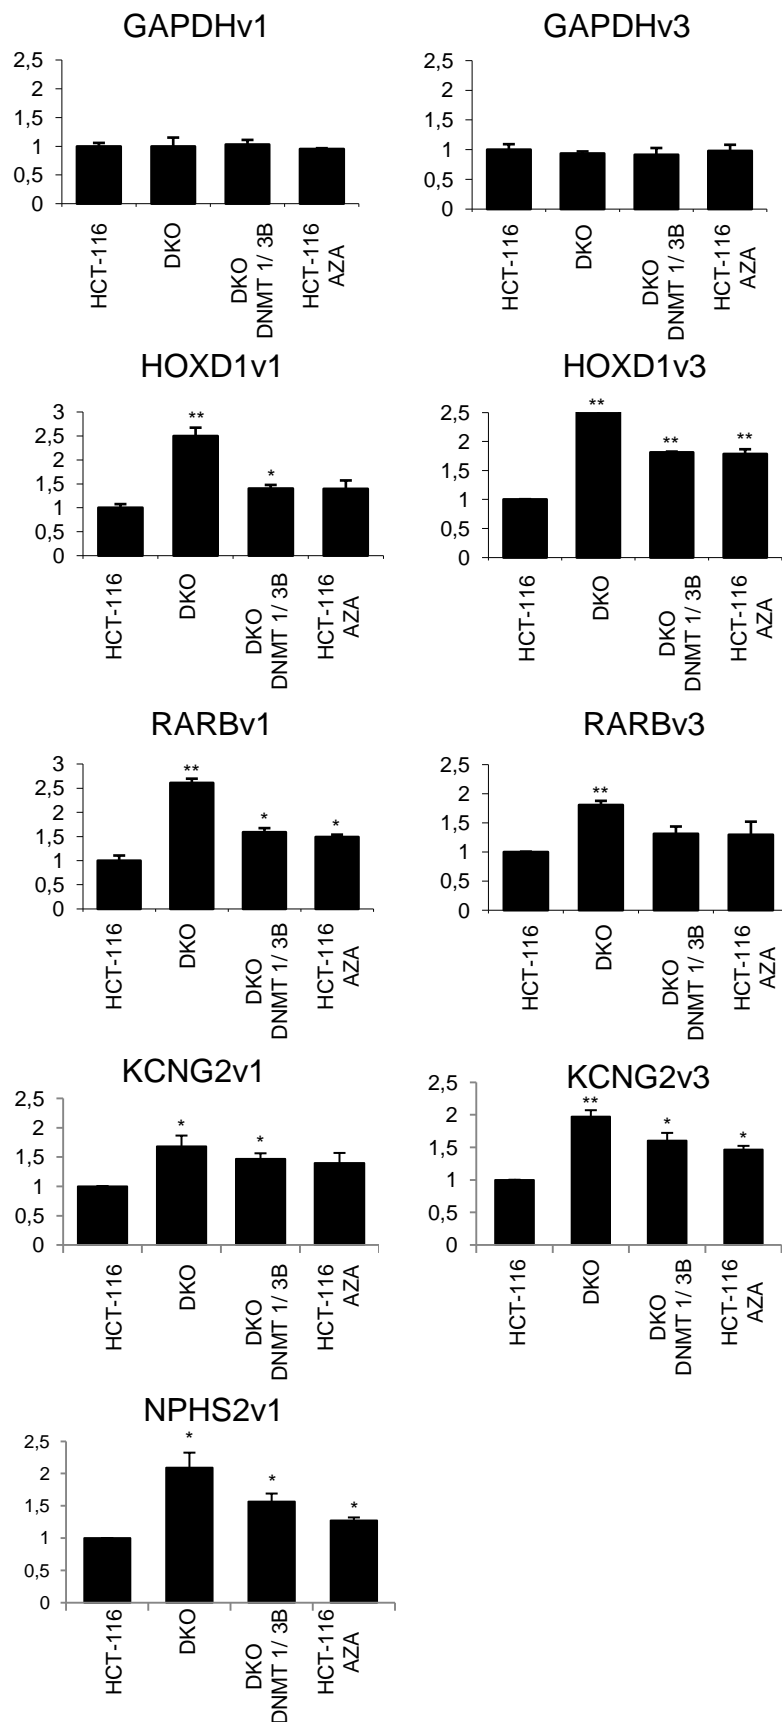

**Supplementary Figure S5.** *MspI* accessibility assay. The results represent the ratio undigested/digested for each sample normalized to undigested/digested for HCT116 (\*  $p < 0.05$ , \*\*  $p < 0.01$ ). Thus, in the case of *GAPDH* they are 1 across all samples. Here the results from regions not containing the TSS are represented. Region version 1 (v1) is the one located upstream the TSS, while version 3 (v3) is the one located downstream the TSS. The results are similar to those obtained in the region containing the TSS: The accessibility is low in HCT-116 cells and much higher in DKO cells. When treating with Aza, HCT-116 becomes more accessible. When reintroducing DNMT1 and DNMT3B in DKO cells, they become less accessible.

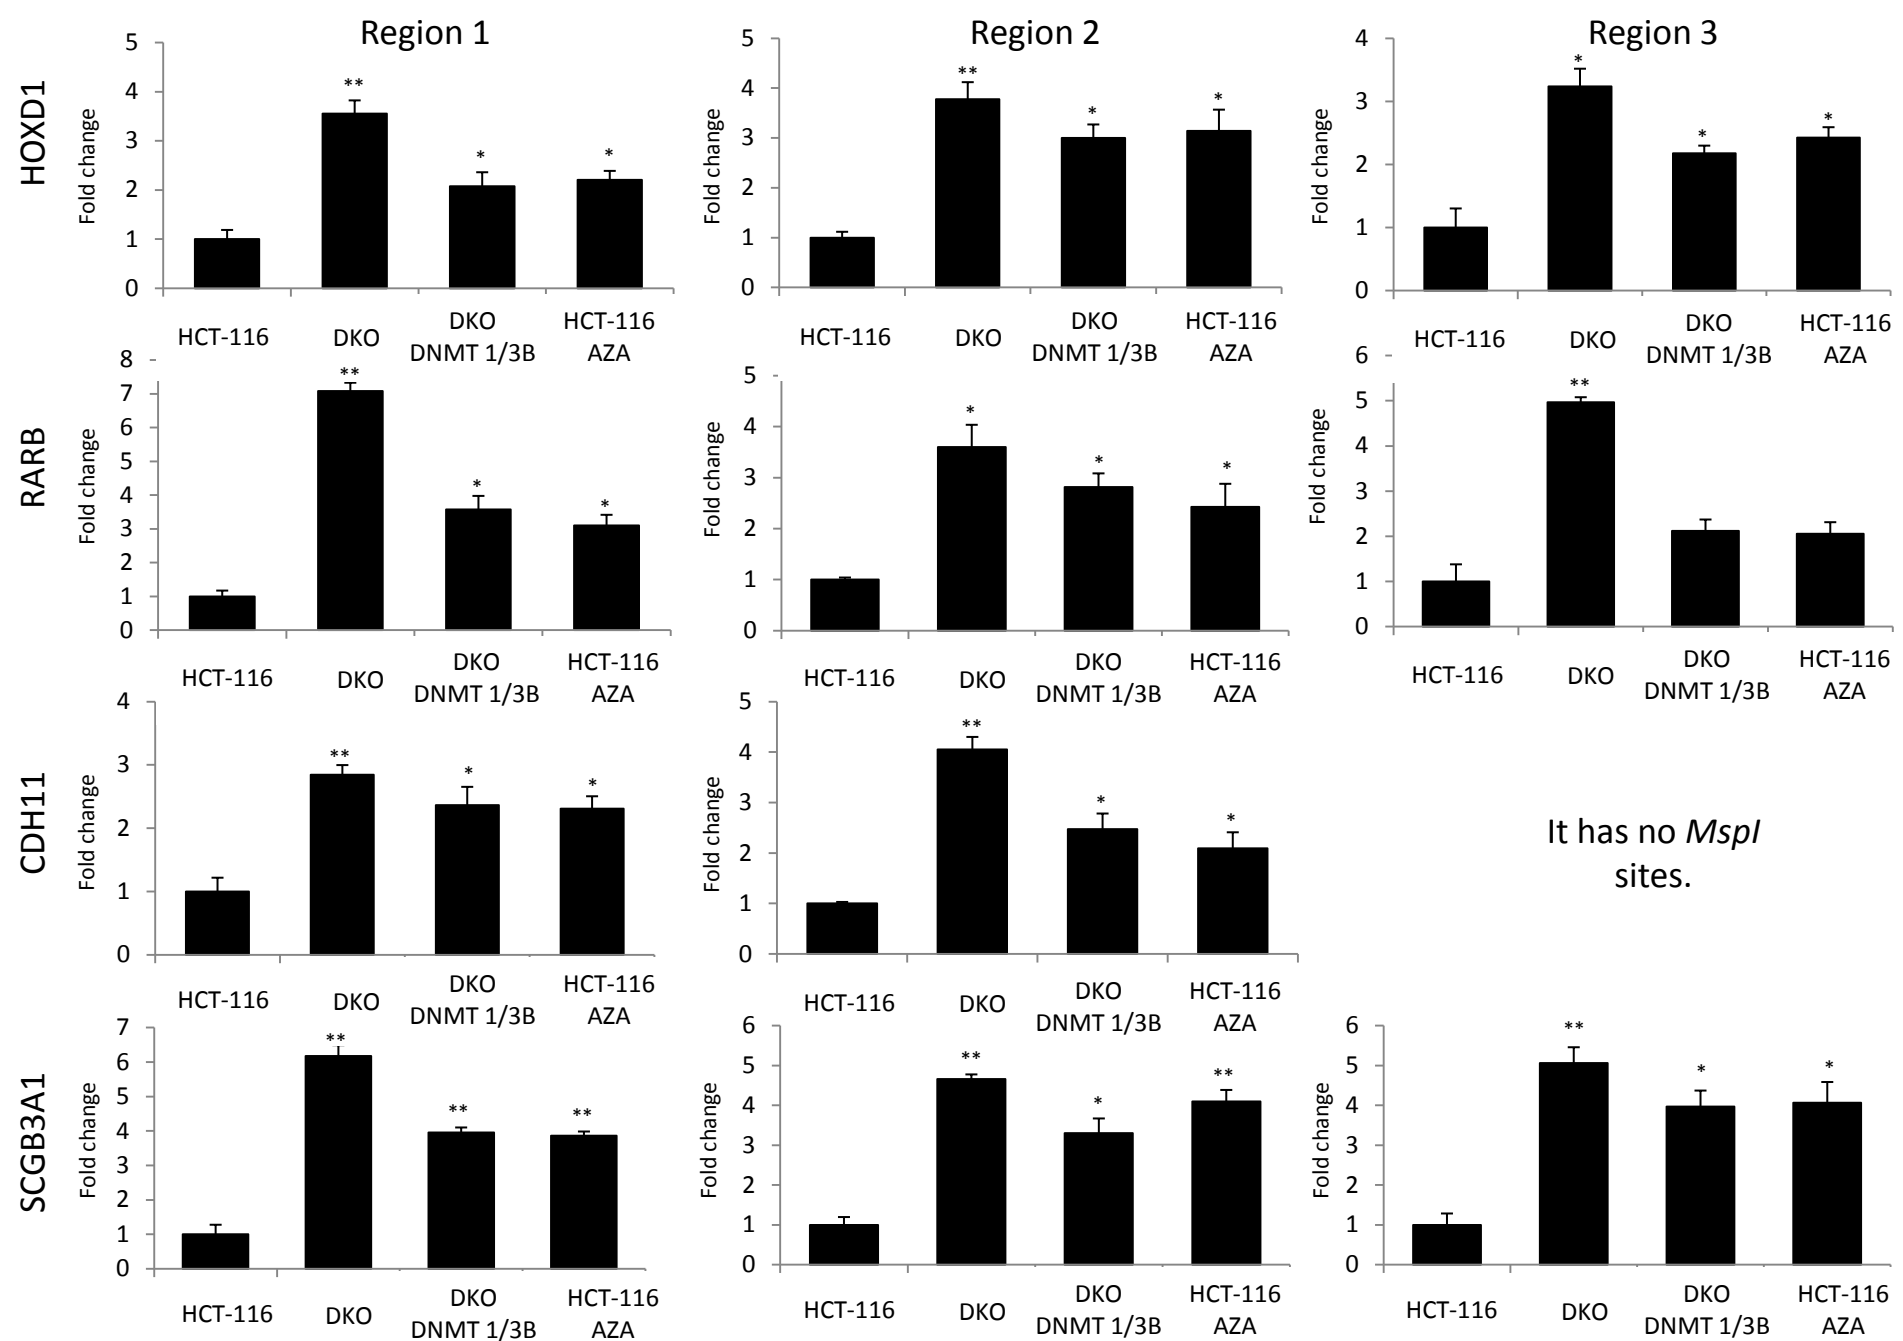

**Supplementary Figure S6.** *MspI* accessibility assay, 100U/mL results. The results are depicted as the fold change between undigested DNA versus 100U/mL digested DNA (\*  $p < 0.05$ , \*\*  $p < 0.01$ ). The accessibility is low in HCT-116 cells and much higher in DKO cells. When treating with the demethylating agent 5-aza-2'-deoxycytidine (Aza), HCT-116 becomes more accessible. When reintroducing DNMT1 and DNMT3B in DKO cells, they become less accessible. *MspI* accessibility assay directly correlates with nucleosome occupancy: higher accessibility, lower nucleosome occupancy.

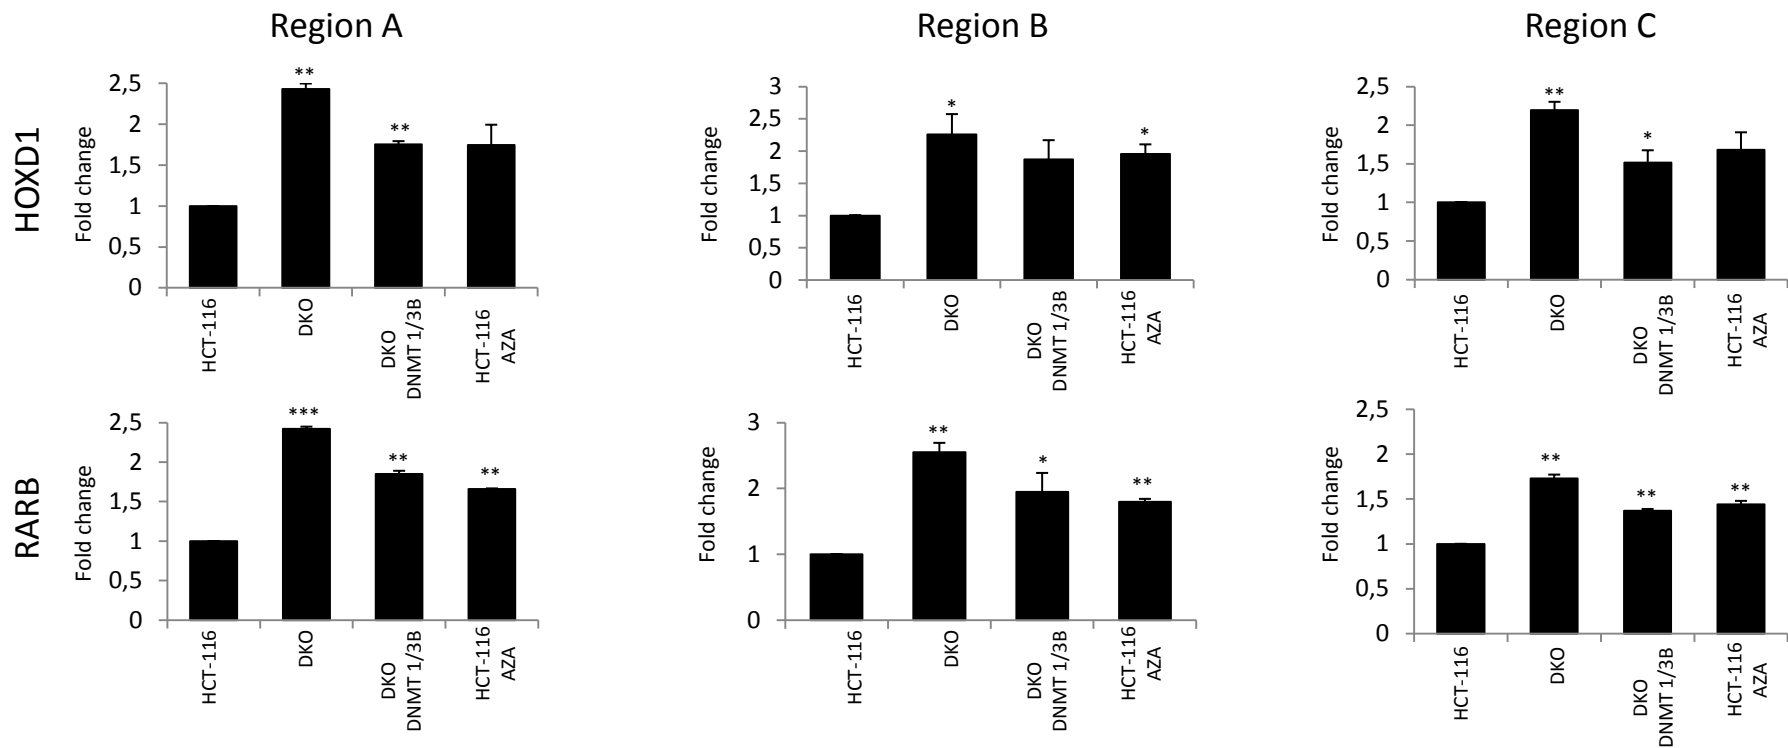

**Supplementary Figure S7.** *MspI* accessibility assay using additional primers to avoid a false positive if one primer is positioned in the linker of a nucleosome occupied region. The results are depicted as the fold change between undigested DNA and 400U/mL digested DNA (\*  $p < 0.05$ , \*\*  $p < 0.01$ , \*\*\*  $p < 0.001$ ). The accessibility is low in HCT-116 cells and much higher in DKO cells. When treating with the demethylating agent 5-aza-2'-deoxycytidine (Aza), HCT-116 becomes more accessible. When reintroducing DNMT1 and DNMT3B in DKO cells, they become less accessible. *MspI* accessibility assay directly correlates with nucleosome occupancy: higher accessibility, lower nucleosome occupancy.



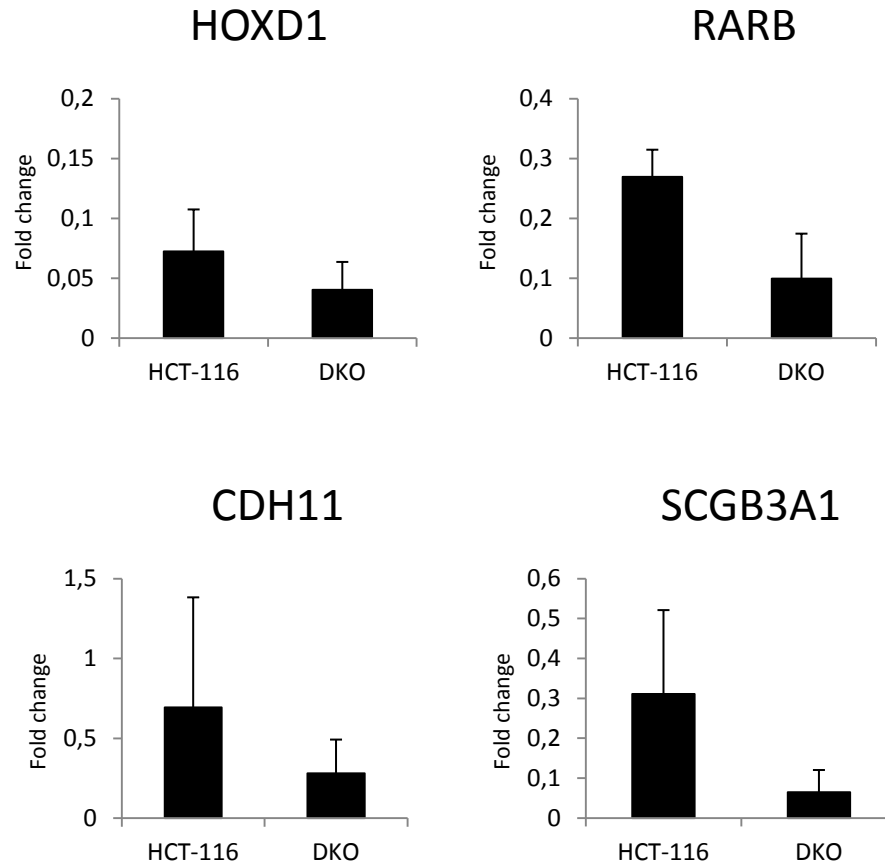

**Supplementary Figure S8.** Chromatin immunoprecipitation (ChIP) assay with H3 antibody performed on promoters regions of *HOXD1*, *RARB*, *CDH11* and *SCGB3A1* genes. Although no statistically significances are observed a clear tendency towards H3 depletion in active promoters can be observed.

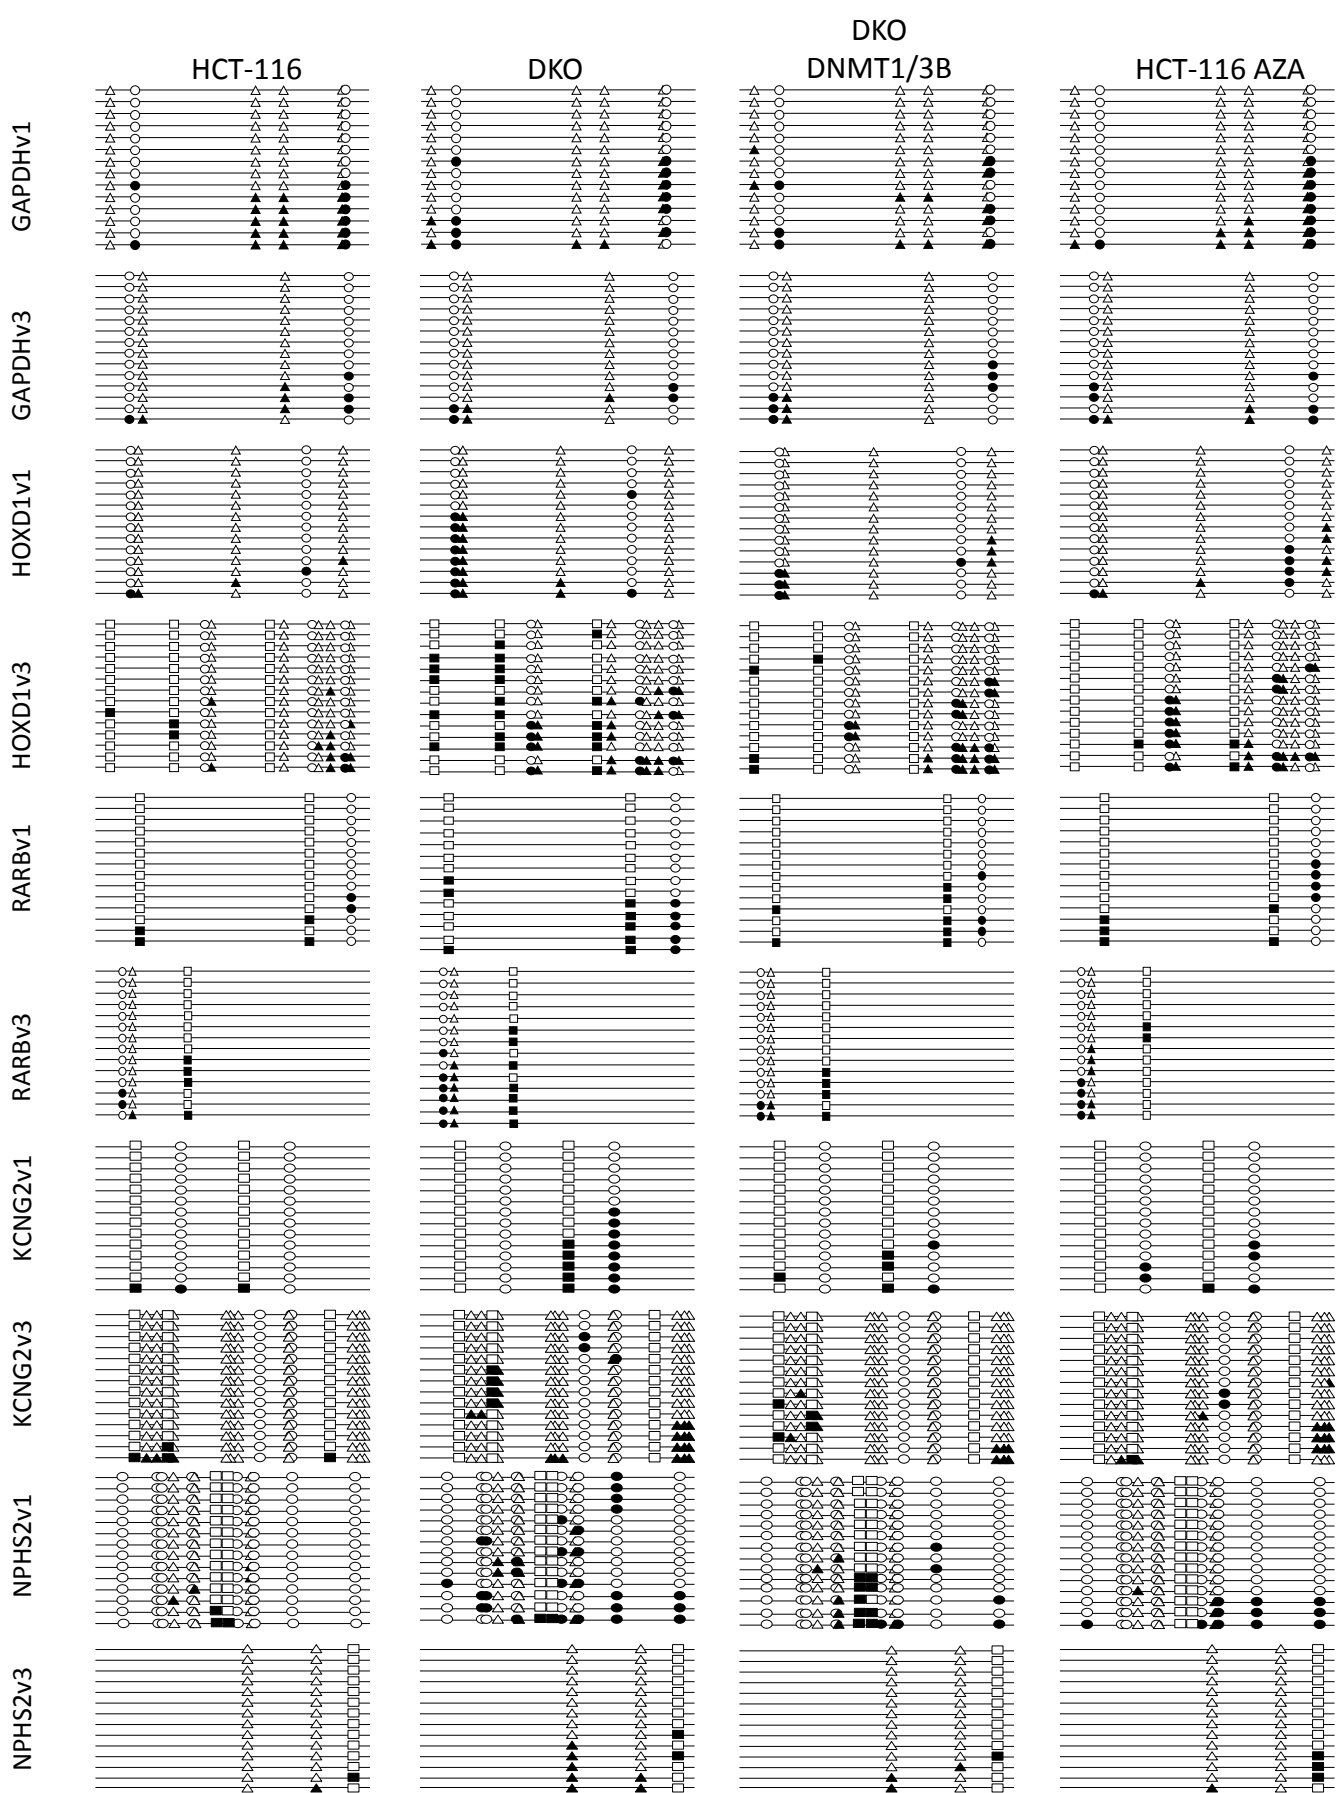

**Supplementary Figure S9.** M-SPA adapted protocol. Circles represent *MspI* methylation sites (C\*CGG), triangles represent *HaeIII* methylation sites (GGC\*C) and squares represent *AluI* methylation sites (AGC\*T). Black figures represent methylated sites, while white ones represent unmethylated. Version 1 (v1) corresponds to the region located upstream the TSS, while the version 3 (v3) corresponds to the region located downstream the TSS.

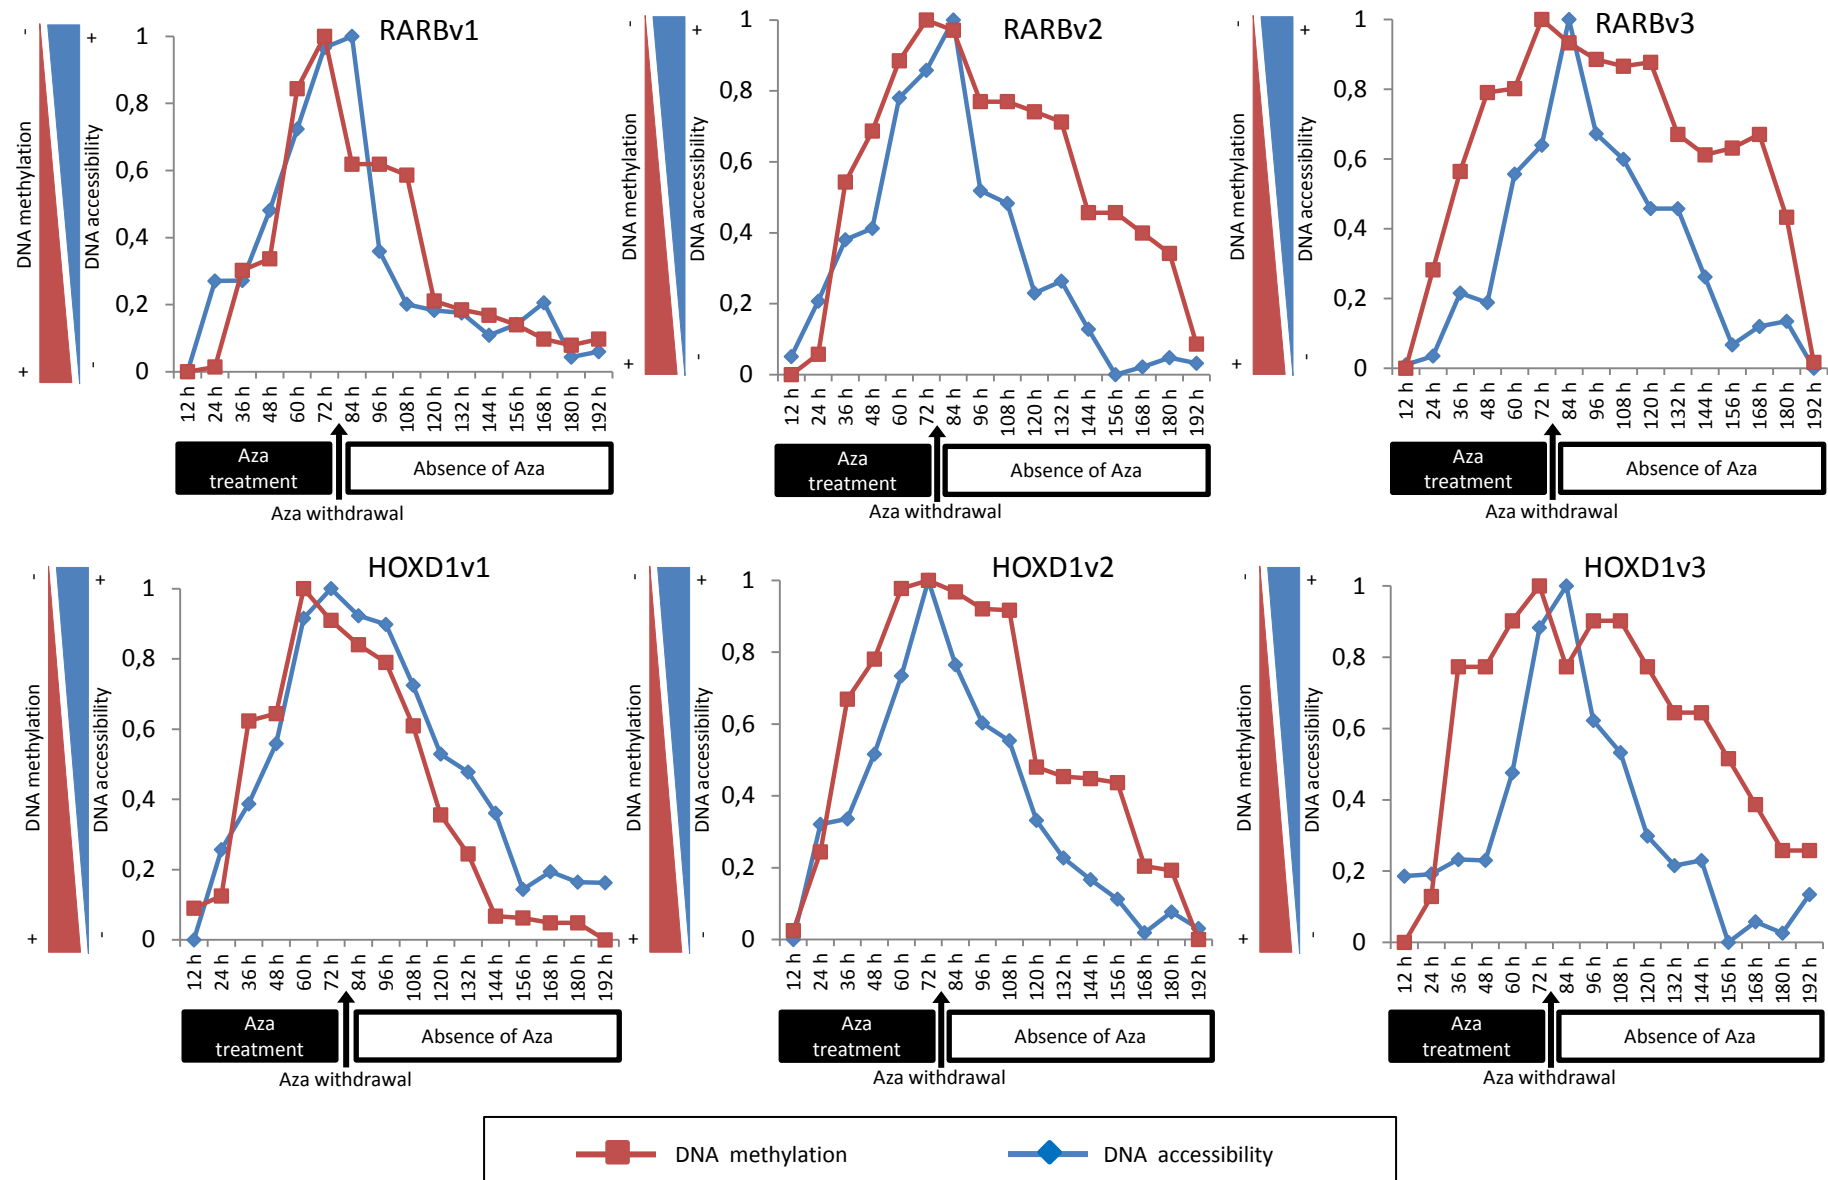

**Supplementary Figure S10.** Time course experiment for DNA methylation and DNA accessibility upon treatment of HCT-116 cells with the demethylating agent 5-aza-2'-deoxycytidine (Aza). The graphs shows sixteen different time points (until 192 hours): six time points with continuous Aza treatment and ten time points after Aza withdrawal at 72 hours. Every 12 hours DNA methylation bisulfite genomic sequencing analysis and *MspI* accessibility assays for three regions of the *HOXD1* and *RARB* promoter CpG islands were performed. Cells were never allowed to reach confluence. DNA methylation data and *MspI* accessibility assays data have been plotted in a single graph in order to facilitate interpretation. Absolute value of 1 in DNA methylation represents the maximum demethylation percentage achieved with the Aza treatment after analyzing eight bisulfite sequencing clones. Absolute value of 1 in DNA accessibility represents the maximum DNA accessibility achieved with the Aza treatment analyzed by *MspI* accessibility assay. The Y axis of the graphs depicts these absolute scaled values.

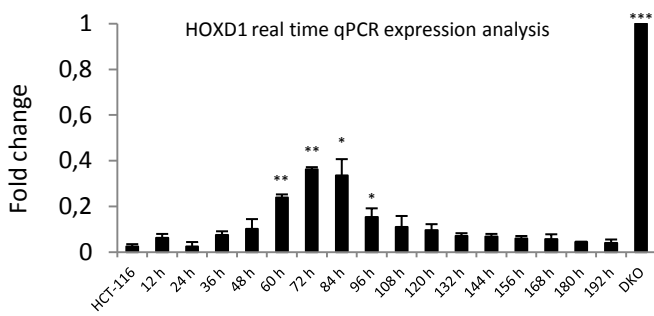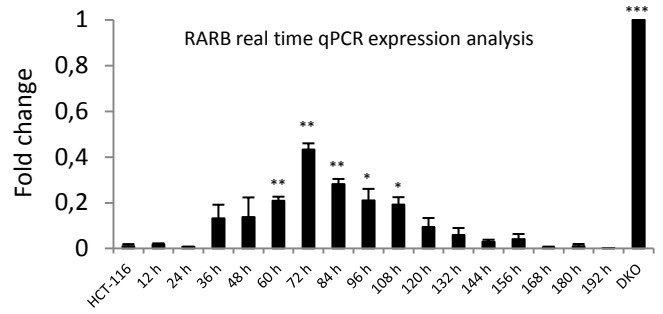

**Supplementary Figure S11.** Time course experiment for gene expression upon treatment of HCT-116 cells with the demethylating agent 5-aza-2'-deoxycytidine (Aza). *GAPDH* expression, was used to normalize the data. (\*  $p < 0.05$ , \*\*  $p < 0.01$ , \*\*\*  $p < 0.001$ ).

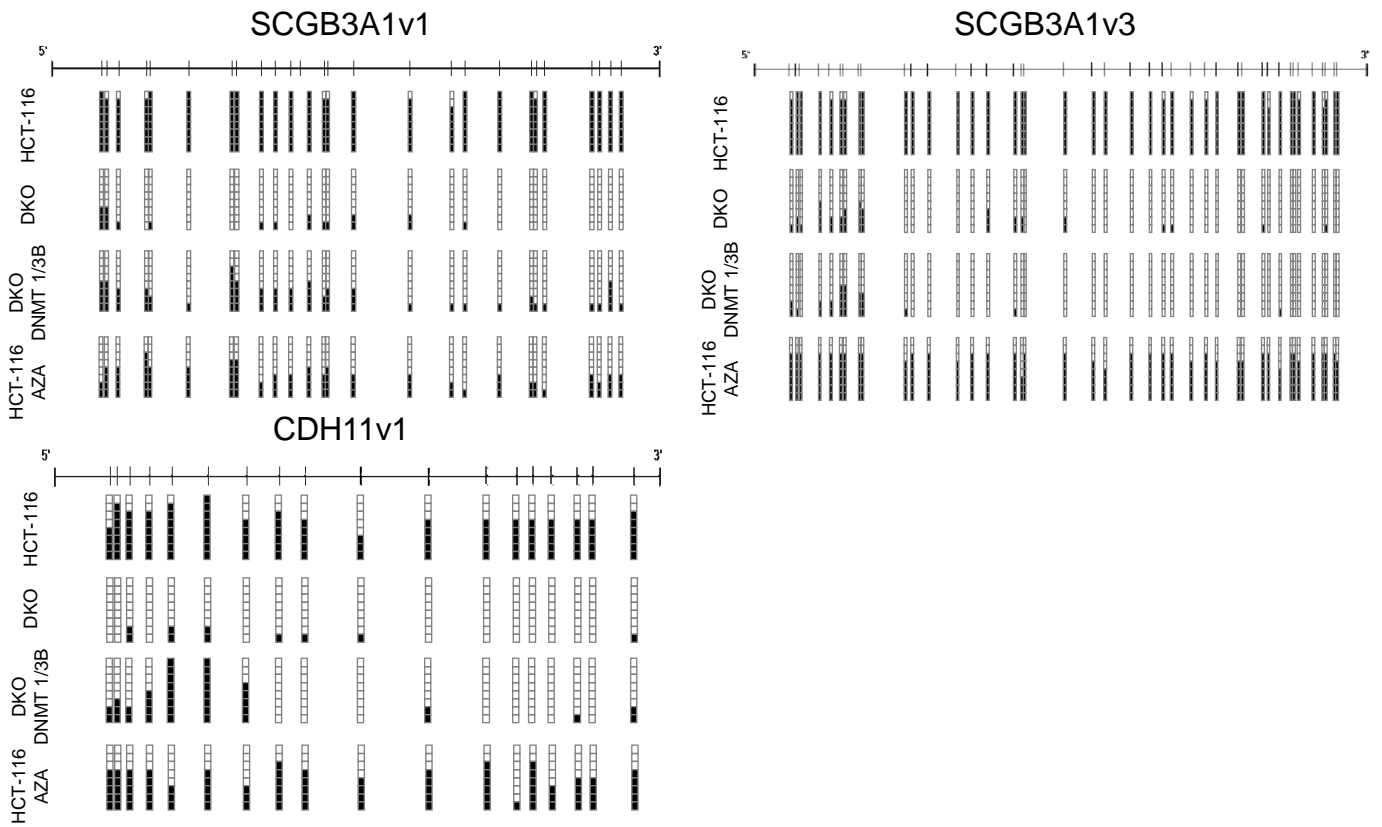

**Supplementary Figure S12.** DNA methylation patterns. Bisulfite sequencing of eight clones for each cell line/treatment studied. The regions presented in this figure are the ones not corresponding to the TSS. Region version 1 (v1) is the one located upstream the TSS, while version 3 (v3) is the one located downstream the TSS. White squares represent unmethylated CpG, while black ones represent methylated CpG.

**a**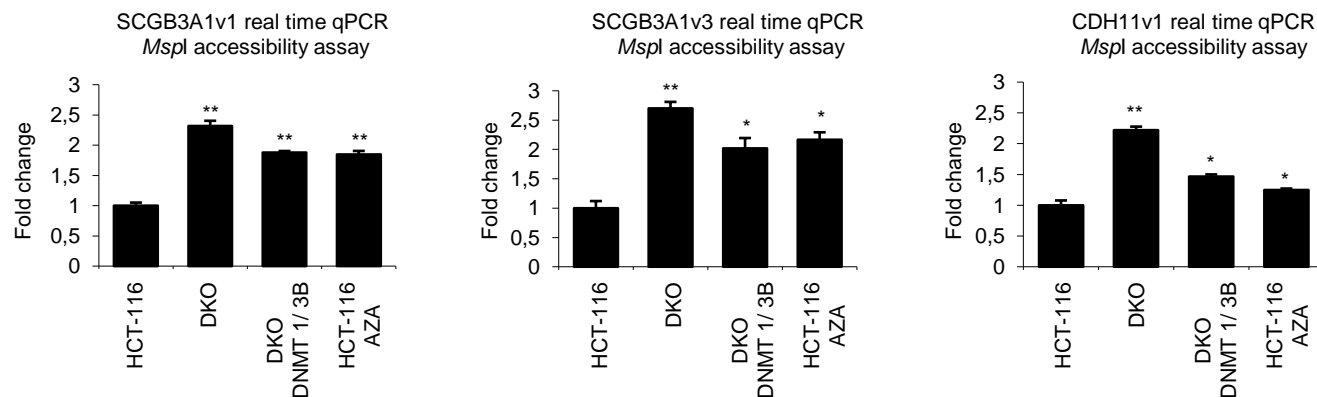**b**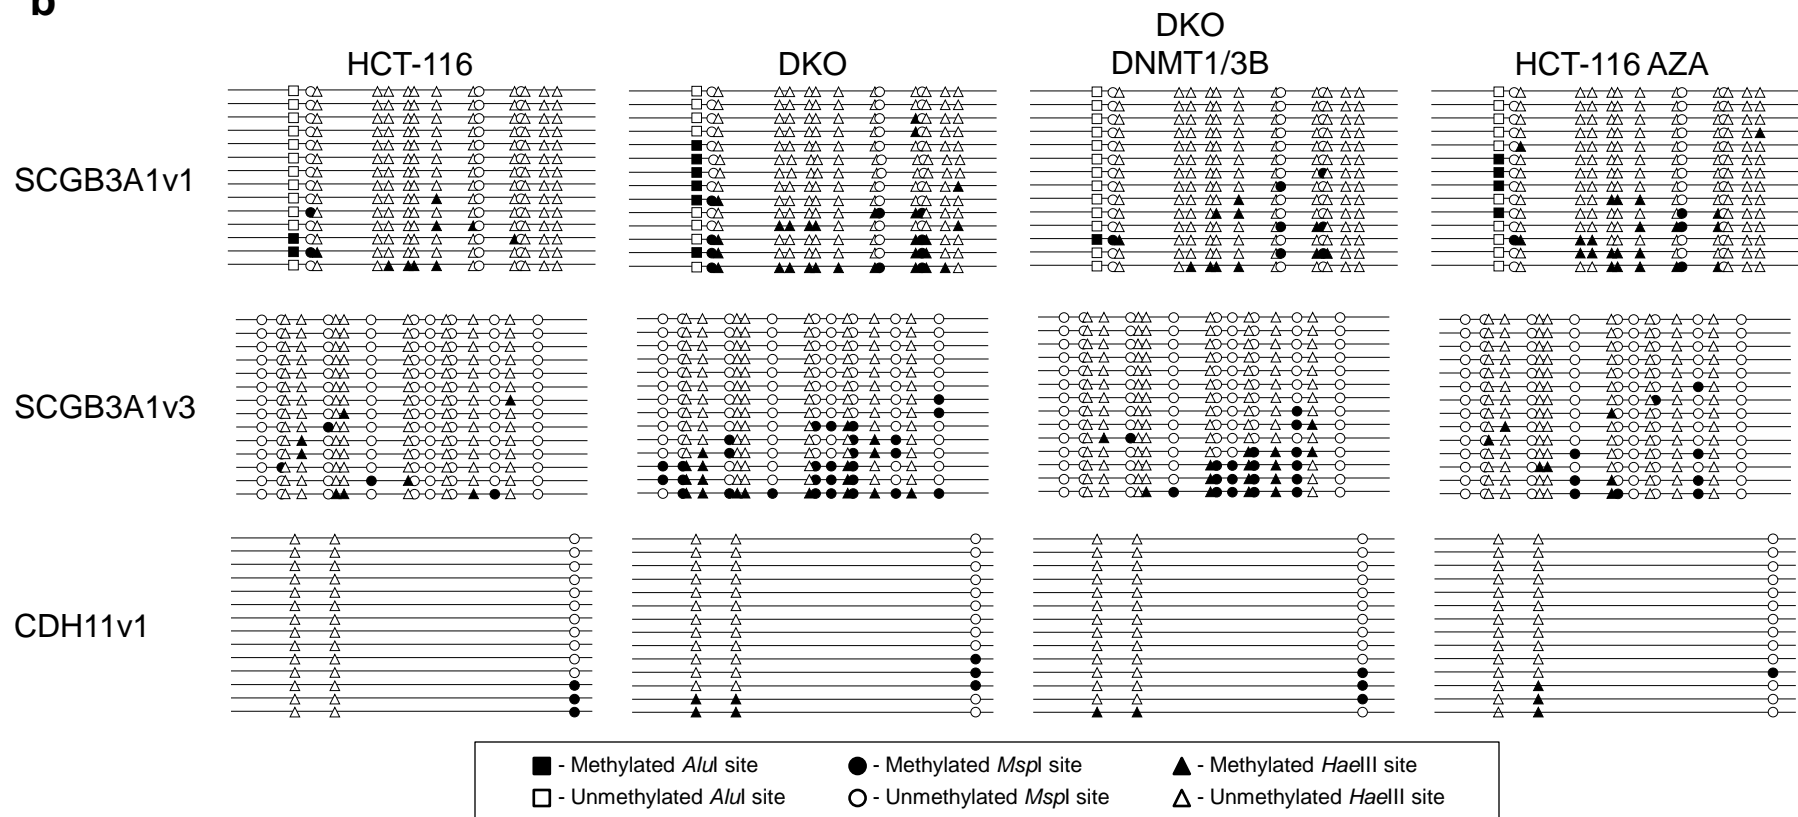

**Supplementary Figure S13.** (a) *MspI* accessibility assay. The results are depicted as the fold change between undigested DNA and 400U/mL digested DNA (\*  $p < 0.05$ , \*\*  $p < 0.01$ ). Here the results from regions not containing the TSS are represented. Region version 1 (v1) is the one located upstream the TSS, while version 3 (v3) is the one located downstream the TSS. (b) M-SPA adapted protocol. Circles represent *MspI* methylation sites (C\*CGG), triangles represent *HaeIII* methylation sites (GGC\*C) and squares represent *AluI* methylation sites (AGC\*T). Black figures represent methylated sites, while white ones represent unmethylated. Version 1 (v1) corresponds to the region located upstream the TSS, while the version 3 (v3) corresponds to the region located downstream the TSS. Accessible regions, where nucleosomes are not positioned become methylated, while inaccessible not.

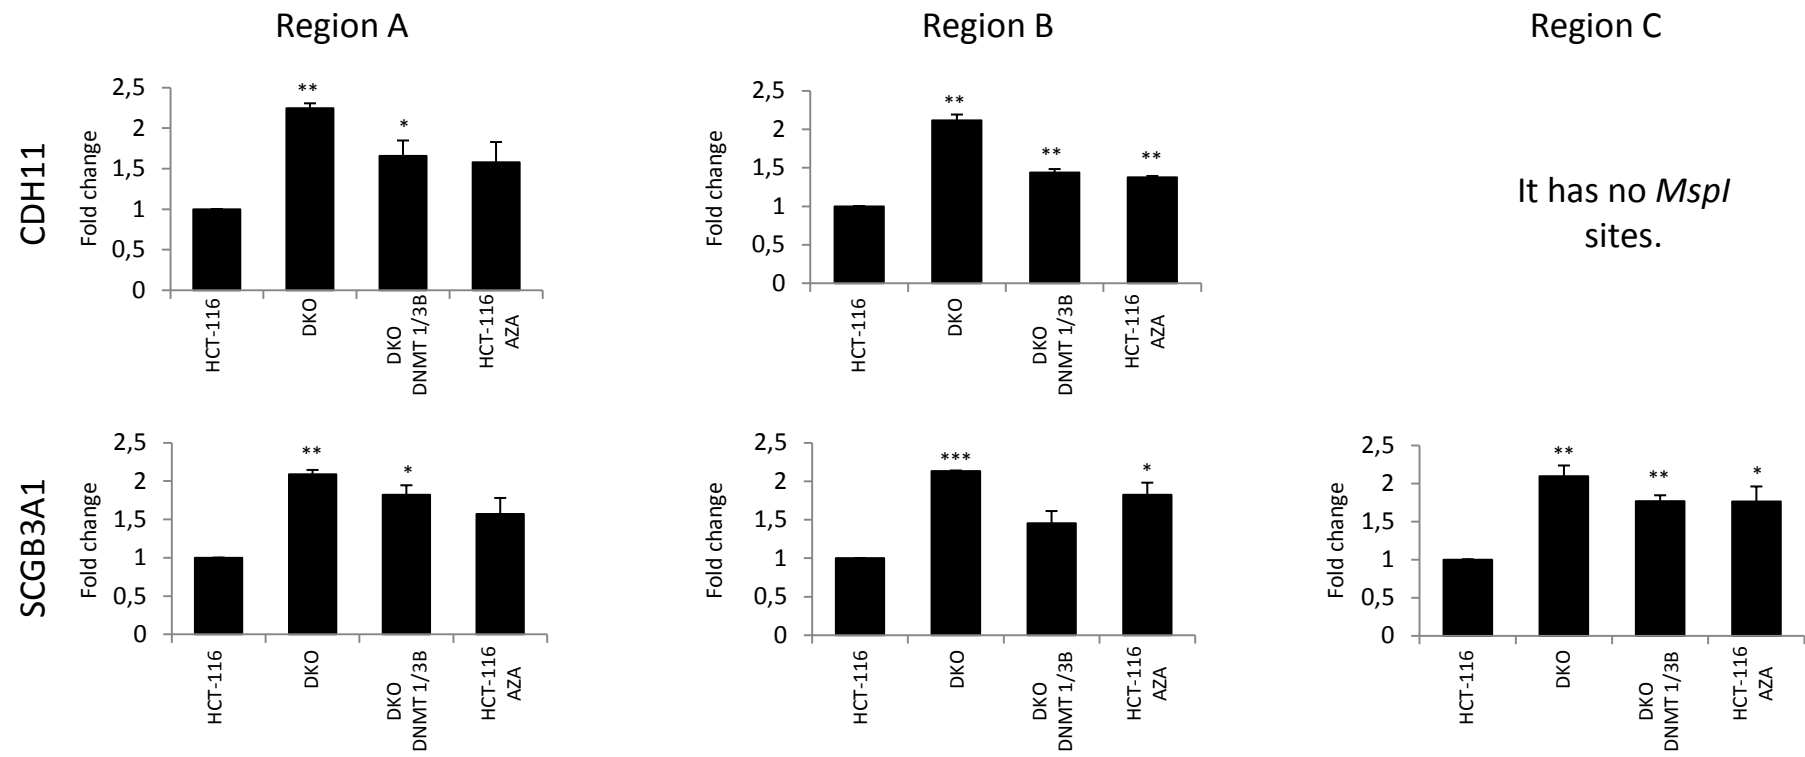

**Supplementary Figure S14.** *MspI* accessibility assay using additional primers to avoid a false positive if one primer is positioned in the linker of a nucleosome occupied region. The results are depicted as the fold change between undigested DNA and 400U/mL digested DNA (\* p<0.05, \*\* p<0.01, \*\*\* p<0.001). The accessibility is low in HCT-116 cells and much higher in DKO cells. When treating with the demethylating agent 5-aza-2'-deoxycytidine (Aza), HCT-116 becomes more accessible. When reintroducing DNMT1 and DNMT3B in DKO cells, they become less accessible. *MspI* accessibility assay directly correlates with nucleosome occupancy: higher accessibility, lower nucleosome occupancy.

### Supplementary Table S1. Primer sequences

#### Primers for bisulfite genomic sequencing and adapted M-SPA:

| Primer name    | Orientation | Sequence                    | TSS distance | Amplicon size |
|----------------|-------------|-----------------------------|--------------|---------------|
| BS-GAPDHv1_s   | Sense       | TTAGTTTTTGAAAGAAAAGAAAGG    | -431         | 361bp         |
| BS-GAPDHv1_a   | Antisense   | CCCAAATCTTAAAACCTAAAC       | -70          |               |
| BS-GAPDHv2_s   | Sense       | GTTTTAAGATTTTGGGTTGGGA      | -86          | 334bp         |
| BS-GAPDHv2_a   | Antisense   | ACCAAACCTCCATACCCAAC        | +248         |               |
| BS-GAPDHv3_s   | Sense       | GTTGGGTATGGAGGTTTGGT        | +228         | 255bp         |
| BS-GAPDHv3_a   | Antisense   | AAAACAACCTACCCTACCCCAT      | +483         |               |
| BS-HOXD1v1_s   | Sense       | GYGTAGAGGATTTAGAAGAGGGGA    | -405         | 370bp         |
| BS-HOXD1v1_a   | Antisense   | ACCAAATTAACCAAAAACAACC      | -35          |               |
| BS-HOXD1v2_s   | Sense       | TTGTTTTGGTTAATTTGGTT        | -54          | 269bp         |
| BS-HOXD1v2_a   | Antisense   | CCCCACCTTTCTAAAAAC          | +215         |               |
| BS-HOXD1v3_s   | Sense       | TTTTAGAAAGGTGGGGTT          | +199         | 293bp         |
| BS-HOXD1v3_a   | Antisense   | ACCCCTCCAAAATACAC           | +492         |               |
| BS-RARBv1_s    | Sense       | GTGTGTTTGGGATAGGGGTAATT     | -722         | 518bp         |
| BS-RARBv1_a    | Antisense   | CTTTCCTATTTCTCTCTTAAAAAC    | -204         |               |
| BS-RARBv2_s    | Sense       | GGGTTGTTGGGAGTTTTTAAGT      | -151         | 367bp         |
| BS-RARBv2_a    | Antisense   | CAAAAAATCCCAAATTCTCCT       | +216         |               |
| BS-RARBv3_s    | Sense       | AAGGAGAATTTGGGATTTTTTT      | +193         | 322bp         |
| BS-RARBv3_a    | Antisense   | AAATCCAAAATTTACCCAAAAC      | +515         |               |
| BS-KCNG2v1_s   | Sense       | TAGTTTTTTGGTTGATTTTGA       | -491         | 302bp         |
| BS-KCNG2v1_a   | Antisense   | CCCRACCTCTACACCTAATC        | -189         |               |
| BS-KCNG2v2_s   | Sense       | GGAGGGGTTTTYGAGYTTAT        | -161         | 264bp         |
| BS-KCNG2v2_a   | Antisense   | ACRCRCCCATACCAAAC           | +103         |               |
| BS-KCNG2v3_s   | Sense       | GAGTTTTTTTTYGATYGTAGT       | +200         | 402bp         |
| BS-KCNG2v3_a   | Antisense   | CCCRAATACRAATTATCCAC        | +602         |               |
| BS-NPHS2v1_s   | Sense       | GGAATTTTTTAGGAGATGAGTTTT    | -565         | 368bp         |
| BS-NPHS2v1_a   | Antisense   | CCTCTCCATCCTCAAARCTAC       | -197         |               |
| BS-NPHS2v2_s   | Sense       | GTAGYTTTGAGGATGGAGAGG       | -218         | 366bp         |
| BS-NPHS2v2_a   | Antisense   | AAAAATAACCTTTCCACCTTA       | +148         |               |
| BS-NPHS2v3_s   | Sense       | TTTTAGGTTGTAATTAAGGGG       | +97          | 354bp         |
| BS-NPHS2v3_a   | Antisense   | AACCTACAACCTACAACCACC       | +451         |               |
| BS-CDH11v1_s   | Sense       | TAGGGGTTAGTATTTTTGGG        | -284         | 224bp         |
| BS-CDH11v1_a   | Antisense   | ACRCRCTAATAACAAAAAT         | -60          |               |
| BS-CDH11v2_s   | Sense       | TTTTATTTTTGTTATTAGYGYG      | -84          | 213bp         |
| BS-CDH11v2_a   | Antisense   | TAAACRCAACCTCCRAAC          | +129         |               |
| BS-SCGB3A1v1_s | Sense       | TAGGGATTAGGGAGTTAGGAAT      | -390         | 311bp         |
| BS-SCGB3A1v1_a | Antisense   | CTCCTAAAAAACCCCTACCC        | -79          |               |
| BS-SCGB3A1v2_s | Sense       | GGGTAGGGTTTTTTTAGGAG        | -99          | 279bp         |
| BS-SCGB3A1v2_a | Antisense   | AAAAAATCAACTAAAATCCACRAT    | +180         |               |
| BS-SCGB3A1v3_s | Sense       | ATYGTGGATTTTAGGTTTTTT       | +156         | 451bp         |
| BS-SCGB3A1v3_a | Antisense   | CCCCAAAAACAATCCA            | +607         |               |
| BS-p53v2_s     | Sense       | AAAATGTTAGTATTTAYGGTATTAGGT | -160         | 363bp         |
| BS-p53v2_a     | Antisense   | AAAAAAAACCTCATCAAATCAA      | +203         |               |
| BS-p53v3_s     | Sense       | TTGAATTTGATGAGTTTTTTTTG     | +181         | 324bp         |
| BS-p53v3_a     | Antisense   | CATCTTTTATTTCAAAAATTCCC     | +505         |               |

#### Primers for quantitative real time PCR:

| Primer name  | Orientation | Sequence               | Amplicon size |
|--------------|-------------|------------------------|---------------|
| qPCR-GAPDH_s | Sense       | TCTTCTTTTGCGTCGCCAG    | 372bp         |
| qPCR-GAPDH_a | Antisense   | AGCCCCAGCCTTCTCCA      |               |
| qPCR-HOXD1_s | Sense       | TTTTCCGGCTTGCTCAAAG    | 318bp         |
| qPCR-HOXD1_a | Antisense   | AGGTGCAAGCAGTTGGCTAT   |               |
| qPCR-RARB_s  | Sense       | TGCCAATACTGTGCGACTCCA  | 195bp         |
| qPCR-RARB_a  | Antisense   | CTGGCAGAGTGAAGGGAAAG   |               |
| qPCR-KCNG2_s | Sense       | CCTCTGCCTGAGACCCAT     | 225 bp        |
| qPCR-KCNG2_a | Antisense   | AGCAGCAGCGACACGTAGA    |               |
| qPCR-NPHS2_s | Sense       | CTGCGTAAAGGTTGTACAAGAG | 277 bp        |
| qPCR-NPHS2_a | Antisense   | TGCACAGCTTTAGATACATGAG |               |



|                 |           |                        |       |
|-----------------|-----------|------------------------|-------|
| qPCR-CDH11_s    | Sense     | GTTCTTGGCCCCAAGTTACA   | 314bp |
| qPCR-CDH11_a    | Antisense | TGGGAGCATTATCGTTGACA   |       |
| qPCR- SCGB3A1_s | Sense     | CCGTGAACCACCTCATAGAG   | 237bp |
| qPCR- SCGB3A1_a | Antisense | TTAACCACGTTTATTGAGAGGG |       |
| qPCR- p53_s     | Sense     | CTCAGATAGCGATGGTCTGG   | 285bp |
| qPCR- p53_a     | Antisense | CAACTGTGCAATAGTTAAACCC |       |

**Primers for *MspI* accessibility assay:**

| Primer name      | Orientation | Sequence             | TSS distance | Amplicon size |
|------------------|-------------|----------------------|--------------|---------------|
| MspI-GAPDHv1_s   | Sense       | CTCAGTCGTTCCCAAAGTCC | -349         | 273bp         |
| MspI-GAPDHv1_a   | Antisense   | GTCTTGAGGCCTGAGCTACG | -76          |               |
| MspI-GAPDHv2_s   | Sense       | CGTAGCTCAGGCCTCAAGAC | -96          | 209bp         |
| MspI-GAPDHv2_a   | Antisense   | CTAGCCTCCCGGGTTTCTCT | +113         |               |
| MspI-GAPDHv3_s   | Sense       | AGAGAAACCCGGGAGGCTA  | +93          | 274bp         |
| MspI-GAPDHv3_a   | Antisense   | TGACTCCGACCTTCACCTTC | +367         |               |
| MspI-HOXD1v1_s   | Sense       | AAGCGCAGAGGACTCAGAAG | -407         | 262bp         |
| MspI-HOXD1v1_a   | Antisense   | CCTGCTCTCGGACAGGTATT | -145         |               |
| MspI-HOXD1v2_s   | Sense       | ACCTGCCCAATACCTGT    | -147         | 232bp         |
| MspI-HOXD1v2_a   | Antisense   | GAGCCGGAGTAAATAGTGG  | +85          |               |
| MspI-HOXD1v3_s   | Sense       | CAGTCTGCTCAGCCTCTG   | +149         | 359bp         |
| MspI-HOXD1v3_a   | Antisense   | GGCACCAGTTTCGTAGGC   | +508         |               |
| MspI-RARBv1_s    | Sense       | AAGGCGCACAGAGGAATTTA | -429         | 274bp         |
| MspI-RARBv1_a    | Antisense   | AAAGCAGACAGCCAGAGAGG | -155         |               |
| MspI-RARBv2_s    | Sense       | CCTCTCTGGCTGTCTGCTTT | -175         | 271bp         |
| MspI-RARBv2_a    | Antisense   | TCCAGTCCTCAAACAGCTC  | +96          |               |
| MspI-RARBv3_s    | Sense       | GCTGTTTGAGGACTGGGATG | +78          | 279bp         |
| MspI-RARBv3_a    | Antisense   | GCACGTAGGCTGTTGGTCTT | +357         |               |
| MspI-KCNG2v1_s   | Sense       | GGGACACACCGTGAGAACTA | -455         | 204bp         |
| MspI-KCNG2v1_a   | Antisense   | GTGACCCGCTTGAGTTATC  | -251         |               |
| MspI-KCNG2v2_s   | Sense       | GGGTCTCCGAGCTCACCT   | -157         | 228bp         |
| MspI-KCNG2v2_a   | Antisense   | CCCACGTTGATGATGACG   | +71          |               |
| MspI-KCNG2v3_s   | Sense       | CGACGAGCTGGCCTACTG   | +305         | 209bp         |
| MspI-KCNG2v3_a   | Antisense   | AGTGCGGGTTGTCCACCA   | +514         |               |
| MspI-NPHS2v1_s   | Sense       | CAGGCCTCTCTGCTTCAG   | -468         | 206bp         |
| MspI-NPHS2v1_a   | Antisense   | GCAGTCCCTGTGGAGTCG   | -262         |               |
| MspI-NPHS2v2_s   | Sense       | GGAGAACAAGAGGGCAAAGG | -141         | 327bp         |
| MspI-NPHS2v2_a   | Antisense   | AGCATCCAGCAATCTGCTCT | +186         |               |
| MspI-HOXD1vA_s   | Sense       | TCTAGGAAAGGGGGAAGAA  | -491         | 189bp         |
| MspI-HOXD1vA_a   | Antisense   | AAGGTTAAATGGGAGCGTGA | -302         |               |
| MspI-HOXD1vB_s   | Sense       | GGGCTGCTTTGGCTAACTT  | -57          | 191bp         |
| MspI-HOXD1vB_a   | Antisense   | CTCCGCCAGCCCTCTCTAC  | +134         |               |
| MspI-HOXD1vC_s   | Sense       | GCCTTCGTGCTGCTGTCTGC | +364         | 208bp         |
| MspI-HOXD1vC_a   | Antisense   | AGTCGTACGCCGGCCCGGA  | +572         |               |
| MspI-RARBvA_s    | Sense       | TGCATGTGCTTTTTCTGGAG | -488         | 294bp         |
| MspI-RARBvA_a    | Antisense   | CCGGCGTTTTCTTTCCTATT | -194         |               |
| MspI-RARBvB_s    | Sense       | TGGGAGTTGGTGATGTCAGA | -116         | 258bp         |
| MspI-RARBvB_a    | Antisense   | GACGGTGCCCAGACAAAC   | +142         |               |
| MspI-RARBvC_s    | Sense       | ATCCGAGCAGGGTTTGTCT  | +113         | 301bp         |
| MspI-RARBvC_a    | Antisense   | GGAGGCAAATGGCATAGAAA | +414         |               |
| MspI-CDH11v1_s   | Sense       | TCCAGGGGTTAGCATCTCTG | -284         | 224bp         |
| MspI-CDH11v1_a   | Antisense   | CGCTAGTGGCAGGAATGAG  | -60          |               |
| MspI-CDH11v2_s   | Sense       | GGTTTCTCATTCTGCCACT  | -84          | 213bp         |
| MspI-CDH11v2_a   | Antisense   | CTTGAGGGTGGACGCAAC   | +129         |               |
| MspI-SCGB3A1v1_s | Sense       | CACGGTCTGGGATCAGAGG  | -409         | 291bp         |
| MspI-SCGB3A1v1_a | Antisense   | CCTGGCCAACCTTCCTGCT  | -118         |               |
| MspI-SCGB3A1v2_s | Sense       | GGCAGGGCTTTCAGGA     | -98          | 273bp         |
| MspI-SCGB3A1v2_a | Antisense   | AGGACCTGGGATCCACGA   | +175         |               |
| MspI-SCGB3A1v3_s | Sense       | GGATCCCAGGTCTCCAG    | +161         | 211bp         |
| MspI-SCGB3A1v3_a | Antisense   | CAAGGGAGGGGACACTCG   | +372         |               |
| MspI-CDH11vA_s   | Sense       | CCAATTCAGTCGCTCCAG   | -366         | 307bp         |
| MspI-CDH11vA_a   | Antisense   | GCGCTAGTGGCAGGAATG   | -59          |               |
| MspI-CDH11vB_s   | Sense       | GGACGGTGGTATCTGAGTCG | +244         | 224bp         |
| MspI-CDH11vB_a   | Antisense   | CTCTGCCCCAGCCAGGTA   | +468         |               |

|                  |           |                       |       |       |
|------------------|-----------|-----------------------|-------|-------|
| Mspl-SCGB3A1vA_s | Sense     | AAAAACGCCCACTTCTGTT   | -552  | 282bp |
| Mspl-SCGB3A1vA_a | Antisense | ACCTTCGCTTTGCGGTCT    | -270  |       |
| Mspl-SCGB3A1vB_s | Sense     | TCCTGCAGCTCCGGTGAG    | +63   | 202bp |
| Mspl-SCGB3A1vB_a | Antisense | GCTGGAGACAGCCCTGAG    | +265  |       |
| Mspl-SCGB3A1vC_s | Sense     | CTCAGGGCTGTCTCCAGC    | +247  | 248bp |
| Mspl-SCGB3A1vC_a | Antisense | AGCCCCGGGACACAGGCGGG  | +495  |       |
| Mspl-p53v2_s     | Sense     | CTCCCCAACTCCATTTCCCTT | -106  | 286bp |
| Mspl-p53v2_a     | Antisense | CAGGAGCTTACCCAATCCAG  | +180  |       |
| Mspl-p53v3_s     | Sense     | GTGGGGACTTAGCGAGTTTG  | +269  | 254bp |
| Mspl-p53v3_a     | Antisense | CCTCAATGCTTTGTGCATCT  | +523  |       |
| Mspl-Neg_s       | Sense     | TTGATTATAGGGGGCAGTCTG | +4375 | 200bp |
| Mspl-Neg_a       | Antisense | AAGGTCTTGGGCAATGT     | +4575 |       |

### Primers for RT-PCR:

| Primer name     | Orientation | Sequence             | Amplicon size |
|-----------------|-------------|----------------------|---------------|
| qPCR-GAPDH_s    | Sense       | TCTTCTTTTGGCTCGCCAG  | 372bp         |
| qPCR-GAPDH_a    | Antisense   | AGCCCCAGCCTTCTCCA    |               |
| RT-PCR_DNMT1_s  | Sense       | GCACGAATTTCTGCAAACAG | 328-376bp     |
| RT-PCR_DNMT1_a  | Antisense   | TGTAATCCTGGGGCTAGGTG |               |
| RT-PCR_DNMT3B_s | Sense       | GGAGACTCATTGGAGACCA  | 252-312bp     |
| RT-PCR_DNMT3B_a | Antisense   | GGCAACATCTGAAGCCATTT |               |

### Primers for CHIP:

| Primer name    | Orientation | Sequence              | TSS distance | Amplicon size |
|----------------|-------------|-----------------------|--------------|---------------|
| ChIP_HOXD1_s   | Sense       | GGGCTGCTTTGGCTAACTT   | -57          | 147bp         |
| ChIP_HOXD1_a   | Antisense   | CGAGTGAGCCGGAGGTAAAT  | +90          |               |
| ChIP_RARB_s    | Sense       | TGGGAGTTGGTGATGTCAGA  | -116         | 147bp         |
| ChIP_RARB_a    | Antisense   | CTGCCTCTGAACAGCTCACTT | +31          |               |
| ChIP_CDH11_s   | Sense       | CCCCGGTTTCTCATTCTT    | -88          | 143bp         |
| ChIP_CDH11_a   | Antisense   | AGTCCCAGTCCCATTAC     | +55          |               |
| ChIP_SCGB3A1_s | Sense       | GGGCGAGACCGGGTATAAG   | -56          | 135bp         |
| ChIP_SCGB3A1_a | Antisense   | CACCGGAGCTGCAGGACA    | +79          |               |
| ChIP_GAPDH_s   | Sense       | GGGCTGGGACTGGCTGAG    | -73          | 152bp         |
| ChIP_GAPDH_a   | Antisense   | CTGGCGACGCAAAAAGAAG   | +79          |               |

**Supplementary Table S2**

| TargetID       | Prob eID | HCT116-MONO.AVG Beta | HCT116.AVG Beta | HCT116-DKO.AVG Beta | PROBE_ID        | GID     | ACCESSIO N     | SYMBOL   | GEN E_ID | CHRO M. | CPG _COORDI NATE | DIST_ TO_TS S | CPG ISLAND | INPUT_SEQUENCE                                             | CG_NO      |
|----------------|----------|----------------------|-----------------|---------------------|-----------------|---------|----------------|----------|----------|---------|------------------|---------------|------------|------------------------------------------------------------|------------|
| AATK_P519_R    | 3        | 0.96097              | 0.96569         | 0.07763             | AATK_P519_R     | 8.9E+07 | XM_927215.1    | AATK     | 9625     | 17      | 76710413         | -519          | Y          | GGGGACGTGCCAGTGGGTCT[CG]AAGAAGGCAGGACAGAAGGCCGG            | cg17279079 |
| AATK_P709_R    | 10       | 0.9576               | 0.88532         | 0.03098             | AATK_P709_R     | 8.9E+07 | XM_927215.1    | AATK     | 9625     | 17      | 76710603         | -709          | Y          | ACGGGTGCCCCGTGGCCAGCAG[CG]GCTCCATGGCCAGCGAGGCCGG           | cg02979355 |
| ADAMTS12_E52_R | 2989     | 0.9442               | 0.92857         | 0.04124             | ADAMTS12_E52_R  | 5.2E+07 | NM_030955.2    | ADAMTS12 | 81792    | 5       | 33927829         | 52            | Y          | AGATGCAGGGTGCATGGTCAGGCG[CG]AGAAGGCAGCGACTGCAAGCTGCC       | cg13887940 |
| CCKBR_P480_F   | 1753     | 0.90564              | 0.92422         | 0.05106             | ADAMTS12_P250_R | 5.2E+07 | NM_030955.2    | ADAMTS12 | 81792    | 5       | 33928131         | -250          | Y          | CGAACGCCAGGCCAGCTGCCGAGC[CG]GCCAAATAGGGGAGACCCGG           | cg24560027 |
| ADCYAP1_P455_R | 41       | 0.88647              | 0.91554         | 0.02012             | ADCYAP1_P455_R  | 1.1E+07 | NM_001117.2    | ADCYAP1  | 116      | 18      | 894932           | -455          | Y          | TCCTGCTGCCCGCTGGTTCCTG[CG]GCTTCTGCTCAGACACCAACGCCA         | cg01799816 |
| ADCYAP1_P398_F | 42       | 0.92027              | 0.90071         | 0.02568             | ADCYAP1_P398_F  | 1.1E+07 | NM_001117.2    | ADCYAP1  | 116      | 18      | 894989           | -398          | Y          | TGCCTCTCGGGTGGTACTCCA[CG]CAGGAACCTGAAGAAGCGCTTTG           | cg01521573 |
| ALK_P28_F      | 3111     | 0.96484              | 0.95142         | 0.01971             | ALK_P28_F       | 2.9E+07 | NM_004304.3    | ALK      | 238      | 2       | 29997964         | -28           | Y          | AGCCGCTGGATCGCATCTGCCTGGG[CG]CCCCCACTTGCAGCTGGCTGAGCCG     | cg14528334 |
| ALK_E183_R     | 31       | 0.9496               | 0.93052         | 0.08589             | ALK_E183_R      | 2.9E+07 | NM_004304.3    | ALK      | 238      | 2       | 29997753         | 183           | Y          | TTCCGAGCACTGGAGCGGCCCGG[CG]GCAGCAGCTGAGGGCGTTCAGG          | cg02931220 |
| MATK_P64_F     | 5744     | 0.86632              | 0.94861         | 0.02574             | ALPL_P278_F     | 1.4E+07 | NM_000478.2    | ALPL     | 249      | 1       | 21708178         | -278          | Y          | TGCCGACGTTAAAGACAAAACAGGAGACG[CG]CGCAAGGAGCAGGTCAGAGCCAGGC | cg03975786 |
| AR_P54_R       | 2265     | 0.93655              | 0.94172         | 0.03114             | AR_P54_R        | 5.9E+07 | NM_001011645.1 | AR       | 367      | X       | 66680545         | -54           | Y          | AGGAGGCCGGCCCGGTGGGGG[CG]GGACCCGACTCGCAAACTGTGCATTT        | cg01329401 |
| ASCL2_P360_F   | 103      | 0.93653              | 0.88374         | 0.04157             | ASCL2_P360_F    | 4.3E+07 | NM_005170.2    | ASCL2    | 430      | 11      | 2249118          | -360          | Y          | CCTAGCGCAGCTATGTCCCAG[CG]CGCCCCACCTGTGCGTTAATCTACTGG       | cg15376678 |
| ASCL2_E76_R    | 3019     | 0.8783               | 0.91058         | 0.07886             | ASCL2_E76_R     | 4.3E+07 | NM_005170.2    | ASCL2    | 430      | 11      | 2248682          | 76            | Y          | GGTCTTAGTGCGCCCCAAAGCAAGGTA[CG]CAGGTCCGGGTTGAGCCCTC        | cg22073478 |
| ASCL2_P609_R   | 105      | 0.89234              | 0.9354          | 0.12184             | ASCL2_P609_R    | 4.3E+07 | NM_005170.2    | ASCL2    | 430      | 11      | 2249367          | -609          | Y          | GGCCTGGAGGTCTGCACCCGAC[CG]CCTTGTCAGGACGGTCAGGT             | cg00868120 |
| ATP10A_P147_F  | 109      | 0.75108              | 0.9095          | 0.04258             | ATP10A_P147_F   | 2.1E+07 | NM_024490.2    | ATP10A   | 57194    | 15      | 23660110         | -147          | Y          | CCACTTTCAGATTCGTTGTTGGG[CG]AACTAGACCGTTTCTTTCCACC          | cg06932470 |
| AXIN1_P995_R   | 4229     | 0.88661              | 0.88109         | 0.04959             | AXIN1_P995_R    | 3.1E+07 | NM_003502.2    | AXIN1    | 8312     | 16      | 343460           | -995          | Y          | GGGACCCGACCGCTGCCCG[CG]CGTGAGGGAAGCAGGCTCCCA               | cg24498552 |
| FLT1_P615_R    | 3783     | 0.85339              | 0.855           | 0.10521             | B3GALT5_P330_F  | 1.5E+07 | NM_033170.1    | B3GALT5  | 10317    | 21      | 39950794         | -330          | N          | GGGGCAGTGACCTAGGCAGAGGG[CG]GGAGCCAGCATGATGGATACACTCAG      | cg06700769 |
| APOA1_P261_F   | 66       | 0.92691              | 0.95357         | 0.22102             | B3GALT5_E246_R  | 1.5E+07 | NM_033170.1    | B3GALT5  | 10317    | 21      | 39951370         | 246           | N          | CACACTCTGGCATCCAG[CG]TCTCCAGCTTGCATGGCCGTGACAGGATT         | cg11479877 |
| BCAP31_P1072_F | 153      | 0.95435              | 0.94779         | 0.02                | BCAP31_P1072_F  | 4.9E+07 | NM_005745.6    | BCAP31   | 10134    | X       | 152644153        | .             | Y          | CCTGACGCGCTCCTGGCTCCTG[CG]GCTGCTGTTCCCGGGTCTGTGCC          | cg08372952 |
| BCAP31_P1131_F | 152      | 0.96591              | 0.96105         | 0.09832             | BCAP31_P1131_F  | 4.9E+07 | NM_005745.6    | BCAP31   | 10134    | X       | 152644212        | .             | Y          | GGGGTGTGGCCCTGCACTCCG[CG]CCTTGGTGAAGCCGCACCTTCTGTCGG       | cg05632706 |
| BCR_P346_F     | 2298     | 0.9461               | 0.95875         | 0.09183             | BCR_P346_F      | 1.1E+07 | NM_021574.1    | BCR      | 613      | 22      | 21852206         | -346          | Y          | CTCTGACACGACGACTGGGAGTGC[CG]GTGACGCTTATGGCACTGCCG          | cg01574123 |
| BCR_P422_F     | 2304     | 0.87448              | 0.91833         | 0.05543             | BCR_P422_F      | 1.1E+07 | NM_021574.1    | BCR      | 613      | 22      | 21852130         | -422          | Y          | TGCTCTCCATGGAAGGTGCCCTC[CG]CATCGTTGGGCCAGATCGCTG           | cg08146988 |

|                |      |         |         |         |                |          |                 |         |        |    |            |       |   |                                                        |            |
|----------------|------|---------|---------|---------|----------------|----------|-----------------|---------|--------|----|------------|-------|---|--------------------------------------------------------|------------|
| JAK3_E64_F     | 5615 | 0.95145 | 0.89473 | 0.03962 | BMP2_P12_01_F  | 45573_68 | NM_0012_00.1    | BMP2    | 650    | 20 | 6696006    | -1201 | Y | AAACTGAAAGTTGAATAACGGGCCAG[CG]GGGAAATAAGAGGCCAGACCCT   | cg26536259 |
| BMP2_E48_R     | 2857 | 0.91473 | 0.84151 | 0.02694 | BMP2_E48_R     | 45573_68 | NM_0012_00.1    | BMP2    | 650    | 20 | 6697255    | 48    | Y | AATAACTTGCCACCCCACTTTG[CG]CCGGTGCCTTTGCCCAAGCGGAGC     | cg18126192 |
| BMP3_P56_R     | 1700 | 0.96207 | 0.96313 | 0.02144 | BMP3_P56_R     | 45573_70 | NM_0012_01.1    | BMP3    | 651    | 4  | 82171087   | -56   | Y | CAGAGCTAGTCTAGTCCCTCG[CG]CGGCCAGTTTGCCGGGTGTTCCCA      | cg14573361 |
| BMP3_E147_F    | 2863 | 0.89096 | 0.80967 | 0.05324 | BMP3_E147_F    | 45573_70 | NM_0012_01.1    | BMP3    | 651    | 4  | 82171290   | 147   | Y | ACCTGTCAGGCTGCGTGGTTCAG[CG]CAGCAAGTGGGGCTGGCCGCTA      | cg06290734 |
| BMP6_P398_F    | 1888 | 0.96144 | 0.96315 | 0.01645 | BMP6_P398_F    | 48092_81 | NM_0017_18.2    | BMP6    | 654    | 6  | 7671611    | -398  | Y | TTCGTGAGCGAGAAGGAAAGTTAAACCT[CG]CGGAATAGACTGGCATTTCCG  | cg08280813 |
| BMP6_P163_F    | 1885 | 0.95281 | 0.96481 | 0.037   | BMP6_P163_F    | 48092_81 | NM_0017_18.2    | BMP6    | 654    | 6  | 7671846    | -163  | Y | GCCAGCGAGGCCAGAGTGACCGCGCCG[CG]ACTCGCAGGAGCCAGGGCGCAGG | cg05319903 |
| GABRB3_P92_F   | 861  | 0.90471 | 0.92136 | 0.19808 | CALCA_P75_F    | 7.7E+0_7 | NM_0010_33952.1 | CALCA   | 796    | 11 | 14950483   | -75   | Y | GGCAGTGTCTCTGATGCCTCCAG[CG]CCAGCGACTGCTCTTATTCGCCCG    | cg14988155 |
| CCKBR_P361_R   | 1756 | 0.9085  | 0.90338 | 0.02152 | CCKBR_P361_R   | 3.3E+0_7 | NM_1768_75.2    | CCKBR   | 887    | 11 | 6237181    | -361  | Y | GCACGCAGACCTGGTCTCAA[CG]CCACTCCACGTTCCCTGATACA         | cg10802353 |
| CCNA1_P216_F   | 186  | 0.96601 | 0.95692 | 0.07048 | CCNA1_P216_F   | 1.6E+0_7 | NM_0039_14.2    | CCNA1   | 8900   | 13 | 35904417   | -216  | Y | CGCCGCTGATTGGCCGATTCAACAGACG[CG]GGTGGGCACTCAGCCGCATCG  | cg05780306 |
| CD81_P272_R    | 220  | 0.93207 | 0.94952 | 0.08141 | CD81_P272_R    | 6.2E+0_7 | NM_0043_56.3    | CD81    | 975    | 11 | 2354851    | -272  | Y | ACGCTGCATGCCTGTCTCAGGCG[CG]GCCCTGCTGCCACCCCTTGGG       | cg26129028 |
| CDH11_E102_R   | 172  | 0.93745 | 0.943   | 0.05166 | CDH11_E102_R   | 1.6E+0_7 | NM_0017_97.2    | CDH11   | 1009   | 16 | 63713318   | 102   | Y | GAGGGTGGACGCAACCTCCGAGC[CG]CCAGTCCCTGGCCAGGGCAAGCG     | cg05318914 |
| CDH11_P203_R   | 3237 | 0.89733 | 0.94624 | 0.06828 | CDH11_P203_R   | 1.6E+0_7 | NM_0017_97.2    | CDH11   | 1009   | 16 | 63713623   | -203  | Y | GAGAAGCCGAGGCTGCGAGAGGAG[CG]JAGATGGGCTCGCAGAGGCT       | cg23907145 |
| CDH13_E102_F   | 4061 | 0.96174 | 0.96663 | 0.03082 | CDH13_E102_F   | 6.2E+0_7 | NM_0012_57.3    | CDH13   | 1012   | 16 | 81218181   | 102   | Y | GTGCATGAATGAAAAACGCCCGGG[CG]CTTCTAGTCGGACAAAATGCAGCCGA | cg15047333 |
| CDH13_P88_F    | 2356 | 0.95857 | 0.97483 | 0.09479 | CDH13_P88_F    | 6.2E+0_7 | NM_0012_57.3    | CDH13   | 1012   | 16 | 81217991   | -88   | Y | CCGTATCTGCCATGCAAAAACGAGGGAG[CG]TTAGGAAGGAATCCGTCTGTAA | cg08977371 |
| CDKN1C_P626_F  | 240  | 0.92745 | 0.93286 | 0.02301 | CDKN1C_P626_F  | 45574_40 | NM_0000_76.1    | CDKN1C  | 1028   | 11 | 2864177    | -626  | Y | CTGCCAGCTCGGCCCTGGCTG[CG]CCGGATGGGGTCTTCGGCTGCCCC      | cg17511511 |
| CEACAM1_E57_R  | 113  | 0.89529 | 0.93167 | 0.01962 | CEACAM1_E57_R  | 6.8E+0_7 | NM_0017_12.3    | CEACAM1 | 634    | 19 | 47724422   | 57    | N | GAGGAGAGCTTGGGCTCCAGGAA[CG]CTTCGAGCACGGCTGCTCTGTC      | cg18176768 |
| CHFR_P635_R    | 270  | 0.91787 | 0.90966 | 0.02527 | CHFR_P635_R    | 89226_74 | NM_0182_23.1    | CHFR    | 5574_3 | 12 | 13197489_2 | -635  | Y | GAAAGAGGAGTAAAGACGGCGAGACG[CG]TCCACGCAGGGGAGTCTGT      | cg18592833 |
| CHGA_E52_F     | 3075 | 0.95512 | 0.93044 | 0.03506 | CHGA_E52_F     | 1.1E+0_7 | NM_0012_75.2    | CHGA    | 1113   | 14 | 92459297   | 52    | Y | TCGAGCCCCGTGCAGGGGAGCTTG[CG]GGAGGATCGACCGACAGAC        | cg15962606 |
| CHGA_P243_F    | 285  | 0.84682 | 0.84175 | 0.03696 | CHGA_P243_F    | 1.1E+0_7 | NM_0012_75.2    | CHGA    | 1113   | 14 | 92459002   | -243  | Y | GGACACAAGGCAATCGGTGGAATCGT[CG]AGGGGTGGAGGATCAGCCACA    | cg02706439 |
| COL18A1_P494_R | 3245 | 0.96601 | 0.96069 | 0.04085 | COL18A1_P494_R | 1.9E+0_7 | NM_1304_44.1    | COL18A1 | 8078_1 | 21 | 45649031   | -494  | Y | CCCTGCAGGGGCTTGCAGGCG[CG]GAGGTGCCGCTTCCCTCTCCGT        | cg00309589 |
| COL18A1_P365_R | 3346 | 0.92406 | 0.92275 | 0.01917 | COL18A1_P365_R | 1.9E+0_7 | NM_1304_44.1    | COL18A1 | 8078_1 | 21 | 45649160   | -365  | Y | CGGGCAGCGGTGTTACCTTC[CG]CATAAACCTGGGCTTCTCGCGGGGCA     | cg26239725 |
| COL1A1_P5_F    | 3253 | 0.96304 | 0.96757 | 0.02917 | COL1A1_P5_F    | 1.5E+0_7 | NM_0000_88.2    | COL1A1  | 1277   | 17 | 45633997   | -5    | Y | AGAACTCCCTGCTGCTCCGA[CG]ACTGGCCCGGGCCCTTTATACTGTC      | cg13069732 |
| COL1A1_P117_R  | 3366 | 0.85666 | 0.91762 | 0.0676  | COL1A1_P117_R  | 1.5E+0_7 | NM_0000_88.2    | COL1A1  | 1277   | 17 | 45634109   | -117  | Y | CGTGCCCGCAATCAGAGCTGCTGGCC[CG]GCCCCAATTGGGAGTTGG       | cg10100754 |
| CYP1B1_E83_R   | 185  | 0.94313 | 0.94749 | 0.06393 | CYP1B1_E83_R   | 1.3E+0_7 | NM_0001_04.2    | CYP1B1  | 1545   | 2  | 38156713   | 83    | Y | GTTGAGATTGAGACTGGGGT[CG]GTGAGTGGCGTCAAATCCATG          | cg09991178 |

|                 |      |         |         |         |                 |         |             |        |      |    |           |       |   |                                                             |            |
|-----------------|------|---------|---------|---------|-----------------|---------|-------------|--------|------|----|-----------|-------|---|-------------------------------------------------------------|------------|
| CYP2E1_P416_F   | 4300 | 0.81723 | 0.95481 | 0.06623 | CYP2E1_P416_F   | 7.6E+07 | NM_000773.3 | CYP2E1 | 1571 | 10 | 135190441 | -416  | N | GCTGTTGCCACCAGGAGGGCCGGTAC[CG]TGTCTAGAGGTGGTCGGCATG         | cg17336072 |
| DBC1_P351_R     | 629  | 0.95722 | 0.95925 | 0.07447 | DBC1_P351_R     | 765708  | NM_014618.1 | DBC1   | 1620 | 9  | 121171873 | -351  | Y | GCACGAGCATCCAAAGGGACCCGCGCATA[CG]CGCAAACCCGGAATCCTGGTGC     | cg14445814 |
| DCC_P471_R      | 2425 | 0.92121 | 0.95308 | 0.04393 | DCC_P471_R      | 4885174 | NM_005215.1 | DCC    | 1630 | 18 | 48120685  | -471  | Y | CCAACAGCATCTCCAGCTCT[CG]CGCGGAATTGTCTCTTCAACTTTACCCA        | cg22055405 |
| DIO3_E230_R     | 3145 | 0.94028 | 0.9505  | 0.15053 | DIO3_E230_R     | 5.6E+07 | NM_001362.2 | DIO3   | 1735 | 14 | 101097671 | 230   | Y | GGCCTGCAGCCACCATGCTC[CG]CTCCCTGCTGCTTCACTCCTTGAGGCTC        | cg18191511 |
| EFNB3_P442_R    | 1828 | 0.79569 | 0.88733 | 0.01966 | EFNB3_P442_R    | 3.8E+07 | NM_001406.3 | EFNB3  | 1949 | 17 | 7548803   | -442  | Y | ACAGGTAGTCGTGACGATCAGCTC[CG]CCGCACTTTGTAAAGCCCAAGCCTTC      | cg00000794 |
| EPHA5_E158_R    | 2693 | 0.73152 | 0.93532 | 0.01927 | EPHA5_E158_R    | 3.3E+07 | NM_182472.1 | EPHA5  | 2044 | 4  | 66217946  | 158   | Y | GAGAAGGCAGTCCAGAGGGGAGCC[CG]TCGAGGTGCAAGTAGCAGCCGGCC        | cg25798792 |
| EPHA8_P256_F    | 1851 | 0.8657  | 0.8678  | 0.04439 | EPHA8_P256_F    | 5.6E+07 | NM_020526.3 | EPHA8  | 2046 | 1  | 22762335  | -256  | Y | GGACGTCCCGATGGTGGCTTCG[CG]CACTGGGGCCCTGAGCCCTG              | cg06991945 |
| EPHA8_P456_R    | 1856 | 0.89798 | 0.94211 | 0.14599 | EPHA8_P456_R    | 5.6E+07 | NM_020526.3 | EPHA8  | 2046 | 1  | 22762135  | -456  | Y | TCACCTAAAAGTGCCTCTGAGTTG[CG]CTGAGCCATCTCTGAGCCTTGCCC        | cg00665502 |
| EPHB1_E202_R    | 2903 | 0.96952 | 0.95777 | 0.17325 | EPHB1_E202_R    | 5.6E+07 | NM_004441.3 | EPHB1  | 2047 | 3  | 135997152 | 202   | Y | GGCTTGTCTCGGCTCGGGC[CG]TCGGCCGGCGATGGCCCTGGATTATCTAC        | cg23448029 |
| EPHB6_E342_F    | 2715 | 0.91827 | 0.93442 | 0.0463  | EPHB6_E342_F    | 5.6E+07 | NM_004445.2 | EPHB6  | 2051 | 7  | 142263256 | 342   | Y | GGGGCGCAGACCTGCAGAGACTG[CG]GCCAACGGGAAAGGTGAGCC             | cg22195019 |
| EPO_E244_R      | 4087 | 0.95887 | 0.93361 | 0.08985 | EPO_E244_R      | 6.2E+07 | NM_000799.2 | EPO    | 2056 | 7  | 100156603 | 244   | Y | CGCCCGGTCCCTGTTTGGAG[CG]GGGATTTAGCCTCCGGCTATTGGCC           | cg13036038 |
| ERG_E28_F       | 312  | 0.96573 | 0.97438 | 0.02682 | ERG_E28_F       | 4.6E+07 | NM_004449.3 | ERG    | 2078 | 21 | 38955460  | 28    | Y | AAAATCCAGCTTACTGTAGCGC[CG]CTCCTCTCTCATGTCCCTCGG             | cg12571150 |
| ESR1_E298_R     | 4092 | 0.79412 | 0.93031 | 0.04717 | ESR1_E298_R     | 6.3E+07 | NM_000125.2 | ESR1   | 2099 | 6  | 152170677 | 298   | Y | GGCTGTGCTCTTTTCCAGGTGGCC[CG]CCGGTTTCTGAGCCTTCTGCCTGCGG      | cg17191385 |
| ER_seq_a1_S60_F | 6020 | 0.90604 | 0.91376 | 0.04776 | ER_seq_a1_S60_F | 6.3E+07 | NM_000125.2 | ESR1   | 2099 | 6  | 152170860 | 481   | Y | CCCCCTGGAGCGGCCCTGGG[CG]AGGTGTACTGGACAGCAGAAGCCCG           | cg16246567 |
| ESR2_E66_F      | 3262 | 0.94653 | 0.95602 | 0.02824 | ESR2_E66_F      | 1.1E+07 | NM_001437.1 | ESR2   | 2100 | 14 | 63830765  | 66    | Y | GGCAGTTATTTCTCGCAGCCTC[CG]CGCTTGCAACTGCCTCCTGGCGGGGGA       | cg25497024 |
| FABP3_E113_F    | 3283 | 0.85851 | 0.85229 | 0.03683 | FABP3_E113_F    | 6.3E+07 | NM_004102.3 | FABP3  | 2170 | 1  | 31618397  | 113   | Y | CTCACCGAGTGACTTCATGTAGTCAT[CG]AAAATCTTGCTGTCCACTAGCTTCCAGGT | cg03365882 |
| ESR2_P162_F     | 756  | 0.9495  | 0.91476 | 0.02954 | FANCE_P356_R    | 6.7E+07 | NM_021922.2 | FANCE  | 2178 | 6  | 35527760  | -356  | Y | CATGACAAGCAACATGCCCTCAG[CG]TAAATACAGCGCGGTCTCTAGCACA        | cg04035266 |
| FES_P223_R      | 4002 | 0.97334 | 0.96049 | 0.25253 | FES_P223_R      | 1.3E+07 | NM_002005.2 | FES    | 2242 | 15 | 89228490  | -223  | Y | CGCTGCCGGGCCCTGGGGCCTG[CG]GGGCGGGGCGGCCCTCTTGCTGGGCCATT     | cg04362933 |
| FGF3_E198_R     | 1333 | 0.96391 | 0.94374 | 0.01239 | FGF3_E198_R     | 1.5E+07 | NM_005247.2 | FGF3   | 2248 | 11 | 69342931  | 198   | Y | CAAAGCGCTGAAAGAAAGGACGGTT[CG]CCAACAAAAGGCCGACGTGGTCC        | cg12845334 |
| FGF3_P171_R     | 5573 | 0.95042 | 0.94681 | 0.02414 | FGF3_P171_R     | 1.5E+07 | NM_005247.2 | FGF3   | 2248 | 11 | 69343300  | -171  | Y | GATGACTGATGTCCTGAAAACAACCTG[CG]GGGAAGTCGAGCTGACAAC          | cg15119027 |
| FGF6_P139_R     | 4016 | 0.93921 | 0.92309 | 0.03043 | FGF6_P139_R     | 1E+07   | NM_020996.1 | FGF6   | 2251 | 12 | 4425180   | -139  | Y | GAGAGCAGAGGGACCCAGGCTGAGCCG[CG]GCCGGTAGAGACCATGGCTCG        | cg01392242 |
| FGF8_P473_F     | 5683 | 0.96458 | 0.8966  | 0.01376 | FGF8_P473_F     | 1.5E+07 | NM_006119.2 | FGF8   | 2253 | 10 | 103526290 | -473  | Y | GCCTGGAGCGCCCGAGTCTGG[CG]GGTCTGGGTCTCCGCTCCGGGCC            | cg15208541 |
| FGF8_E183_F     | 1334 | 0.79548 | 0.8894  | 0.02198 | FGF8_E183_F     | 1.5E+07 | NM_006119.2 | FGF8   | 2253 | 10 | 103525634 | 183   | Y | CACAGGCAGCTCAGCGCGGAG[CG]GGGGCTGCCATGGCGCGGCCCC             | cg02429245 |
| FGFR3_P1152_R   | 2536 | 0.85171 | 0.89158 | 0.05804 | FGFR3_P1152_R   | 1.3E+07 | NM_022965.1 | FGFR3  | 2261 | 4  | 1764269   | -1152 | Y | GCGGGCTCTCAGGCGGCTTAGCTG[CG]TGCGGCCCCAGGTCAGTCAACG          | cg12221596 |

|               |      |         |         |         |               |             |                    |        |           |    |               |      |   |                                                             |            |
|---------------|------|---------|---------|---------|---------------|-------------|--------------------|--------|-----------|----|---------------|------|---|-------------------------------------------------------------|------------|
| FLI1_P620_R   | 5708 | 0.88594 | 0.91668 | 0.02488 | FLI1_P620_R   | 71105<br>92 | NM_0020<br>17.2    | FLI1   | 2313      | 11 | 12806857<br>9 | -620 | Y | GAGTCTTCCCCGGCAGTAGG[CG]CTGGGTTACCCGCAGC<br>CCTAGCCA        | cg26979016 |
| FLT4_P180_R   | 3804 | 0.95259 | 0.94962 | 0.02357 | FLT4_P180_R   | 45037<br>52 | NM_0020<br>20.1    | FLT4   | 2324      | 5  | 18000935<br>2 | -180 | Y | GGCGTCCGGTGCACCCGAGCAGTGC[CG]CTCCGACCA<br>CAGGGTCCGGGCC     | cg20020551 |
| TUSC3_P85_R   | 2164 | 0.88247 | 0.79516 | 0.02074 | FN1_E469_F    | 4.7E+0<br>7 | NM_0540<br>34.2    | FN1    | 2335      | 2  | 21600856<br>7 | 469  | Y | AACTCAGCCCCAACTTTGGT[CG]GCTTTAGGGTCCCATC<br>CCTGAGGCA       | cg01966735 |
| FANCA_P1006_R | 3977 | 0.93506 | 0.88785 | 0.18049 | FRK_P36_F     | 3.2E+0<br>7 | NM_0020<br>31.2    | FRK    | 2444      | 6  | 11648865<br>0 | -36  | N | CCTGTTTCAAGTCTGTTCTGTCTTT[CG]ACCAGTCCGGAT<br>CTGGACGGCTCTCT | cg18764771 |
| FZD7_E296_F   | 1600 | 0.93262 | 0.95324 | 0.03523 | FZD7_E296_F   | 45038<br>32 | NM_0035<br>07.1    | FZD7   | 8324      | 2  | 20260785<br>1 | 296  | Y | TGCTGGGCCACACGAACCAAGAGGAC[CG]GGCCTCGA<br>GGTGCACCAATTCT    | cg18631360 |
| FZD9_E458_F   | 5551 | 0.96031 | 0.9613  | 0.06144 | FZD9_E458_F   | 6.3E+0<br>7 | NM_0035<br>08.2    | FZD9   | 8326      | 7  | 72486503      | 458  | Y | GCGGCTGCCGAGCTAGCGGAGTTCG[CG]CCGCTGGTGCA<br>GTACGGCTGCC     | cg25707686 |
| GABRB3_E42_F  | 3299 | 0.93339 | 0.94522 | 0.12408 | GABRB3_E42_F  | 3E+07       | NM_0219<br>12.2    | GABRB3 | 2562      | 15 | 24569978      | 42   | Y | CGGAGCACATGGCGCTGTTCTC[CG]GCCTAACCTGCTG<br>GGATCCGCTCTCC    | cg20421990 |
| BRCA1_P835_R  | 2318 | 0.79785 | 0.8718  | 0.03133 | GABRG3_E123_R | 1.5E+0<br>7 | NM_0332<br>23.1    | GABRG3 | 2567      | 15 | 25343888      | 123  | N | CCGTACAACCTCCCCTGGGAGA[CG]ACAGCTGGAGGCCCC<br>TGGCTTGTGACTGC | cg16701428 |
| GALR1_E52_F   | 3314 | 0.88831 | 0.92892 | 0.08589 | GALR1_E52_F   | 60311<br>65 | NM_0014<br>80.2    | GALR1  | 2587      | 18 | 73090773      | 52   | Y | GCTCGGCACCCGTGACTTCTAAGGGG[CG]CGGATTTTCCAG<br>CCGAGCTGTTTTT | cg15343119 |
| GAS7_E148_F   | 606  | 0.96563 | 0.96015 | 0.02297 | GAS7_E148_F   | 4.1E+0<br>7 | NM_0036<br>44.2    | GAS7   | 8522      | 17 | 10042445      | 148  | Y | CCGGACATGCGCTTGGCGCC[CG]GGTTTACAGCGCAGCC<br>TGCATTCC        | cg20649212 |
| GDF10_P95_R   | 890  | 0.96436 | 0.93268 | 0.06422 | GDF10_P95_R   | 1.2E+0<br>7 | NM_0049<br>62.2    | GDF10  | 2662      | 10 | 48059267      | -95  | Y | CTCCCCAGCCGAGAGCCCGAGACCCAGCCC[CG]CAGCCG<br>GCTCCTGTGTGTCGG | cg03251024 |
| GML_P281_R    | 5741 | 0.94577 | 0.93603 | 0.0289  | GML_P281_R    | 45040<br>32 | NM_0020<br>66.1    | GML    | 2765      | 8  | 14391293<br>8 | -281 | N | CCTGGCGGTGCCAACAGGCTGC[CG]AGGGTGGCTGCT<br>GTCCCGTTTCTCCAGC  | cg20178722 |
| GP1BB_P278_R  | 926  | 0.90035 | 0.94728 | 0.12377 | GP1BB_P278_R  | 99453<br>87 | NM_0004<br>07.3    | GP1BB  | 2812      | 22 | 18090788      | -278 | Y | ACACGATGCTCCGTTTTCTTC[CG]TTGTGAATGCCGCGTC<br>CTGCTCTGGTGACA | cg19755554 |
| GSTM2_E153_F  | 3354 | 0.96534 | 0.96129 | 0.02792 | GSTM2_E153_F  | 2.3E+0<br>7 | NM_0008<br>48.2    | GSTM2  | 2946      | 1  | 11001236<br>7 | 153  | Y | GGGAAGTGTGGAGCAGCTGCAGGA[CG]GGCTTAGGGA<br>CGGTTCC           | cg07246306 |
| GSTM2_P109_R  | 946  | 0.90077 | 0.93174 | 0.05632 | GSTM2_P109_R  | 2.3E+0<br>7 | NM_0008<br>48.2    | GSTM2  | 2946      | 1  | 11001210<br>5 | -109 | N | ATCCTACTCTAGCCCCATGAG[CG]CGCTCCAGGCCTCCA<br>GATTGCC         | cg25855733 |
| GUCY2D_E419_R | 2999 | 0.97508 | 0.9573  | 0.06611 | GUCY2D_E419_R | 45042<br>16 | NM_0001<br>80.1    | GUCY2D | 3000      | 17 | 7847132       | 419  | Y | CGGGTGGGCTTCCGGACCC[CG]GGCTTGGCGTCCCGCG<br>TGGTGGGCTCC      | cg13065528 |
| HCK_P46_R     | 5769 | 0.94522 | 0.91455 | 0.01959 | HCK_P46_R     | 3.1E+0<br>7 | NM_0021<br>10.2    | HCK    | 3055      | 20 | 30103672      | -46  | Y | GGCGGAGTTAGCTCGCTCAGGG[CG]CGGCTAAGGCGC<br>CCAGATGGCCTGCGG   | cg15382497 |
| GFI1_P208_R   | 4071 | 0.94598 | 0.76137 | 0.0535  | HCK_P858_F    | 3.1E+0<br>7 | NM_0021<br>10.2    | HCK    | 3055      | 20 | 30102860      | -858 | Y | TGGTGTCTGAATGGAGCAGGCTG[CG]GAAGAGAAACC<br>GCTGACCACAGACC    | cg04775393 |
| PDE1B_E141_F  | 2862 | 0.91209 | 0.76279 | 0.04162 | HGF_E102_R    | 5.9E+0<br>7 | NM_0010<br>10933.1 | HGF    | 3082      | 7  | 81237286      | 102  | N | ATGCCTGGGTGAAAGAATCCTGTT[CG]GAGTCAGTGCCT<br>AAAAGAGCCAGTCC  | cg08988647 |
| HHIP_E94_F    | 2760 | 0.89836 | 0.90951 | 0.0487  | HHIP_E94_F    | 2E+07       | NM_0224<br>75.1    | HHIP   | 6439<br>9 | 4  | 14578671<br>7 | 323  | Y | GGGGCGCGCTGTGGCAGCACCTCCC[CG]CGCGCTAGTTA<br>AAAAGAAGAAAAG   | cg21706827 |
| HHIP_P307_R   | 2209 | 0.85502 | 0.82672 | 0.04739 | HHIP_P307_R   | 2E+07       | NM_0224<br>75.1    | HHIP   | 6439<br>9 | 4  | 14578631<br>6 | -307 | Y | GGCCACTCTTACTTCTTTT[CG]GAGCCTCAGCTTGG<br>CCGCTTTAGCC        | cg20605716 |
| NCL_P1102_F   | 1587 | 0.96839 | 0.94693 | 0.20545 | HIC2_P528_R   | 3.2E+0<br>7 | NM_0150<br>94.1    | HIC2   | 2311<br>9 | 22 | 20101165      | -528 | Y | CCCGAGCTTCAGTCACTGCTGGCTG[CG]CCTTTGAGCCT<br>CGGGCAACCGCAG   | cg21212889 |
| HLF_E192_F    | 678  | 0.93026 | 0.96722 | 0.03276 | HLF_E192_F    | 3.2E+0<br>7 | NM_0021<br>26.3    | HLF    | 3131      | 17 | 50697562      | 192  | Y | TGAACATTTTGAAAACGAGGGGTT[CG]AGGCAGGTGAG<br>AGCATCCTGCACGT   | cg05876326 |
| HPN_P823_F    | 4931 | 0.91936 | 0.93872 | 0.21527 | HPN_P823_F    | 3.4E+0<br>7 | NM_1829<br>83.1    | HPN    | 3249      | 19 | 40222427      | -823 | N | CCTCTGAAAGCAAAGAGAAGTGCACGGG[CG]TCCAGGTG<br>GCCGAATAGCCCTG  | cg00566101 |

|               |      |         |         |         |               |             |                    |        |           |    |               |      |   |                                                              |            |
|---------------|------|---------|---------|---------|---------------|-------------|--------------------|--------|-----------|----|---------------|------|---|--------------------------------------------------------------|------------|
| HS3ST2_P171_F | 1088 | 0.90519 | 0.91382 | 0.03219 | HS3ST2_P171_F | 51744<br>62 | NM_0060<br>43.1    | HS3ST2 | 9956      | 16 | 22733190      | -171 | Y | GCCGCCCCGGCTGCCCGGAGCCCCAT[CG]CCTAGGACCGG<br>GAGATGCTG       | cg03823653 |
| HS3ST2_E145_R | 3482 | 0.96973 | 0.96613 | 0.10827 | HS3ST2_E145_R | 51744<br>62 | NM_0060<br>43.1    | HS3ST2 | 9956      | 16 | 22733506      | 145  | Y | CGCAGGCTGCTCTTCGCCTTCA[CG]CTCTCGCTCTCTGCA<br>CTTACCTGTGTTAC  | cg22228897 |
| ICAM1_P386_R  | 2658 | 0.8649  | 0.9702  | 0.02083 | ICAM1_P386_R  | 45578<br>77 | NM_0002<br>01.1    | ICAM1  | 3383      | 19 | 10242393      | -386 | Y | GACTTGAGTTCGGACCCCT[CG]CAGCCTGGAGTCTCAGT<br>TTACCGCTTTGT     | cg05106269 |
| ICAM1_E242_F  | 4104 | 0.84384 | 0.85112 | 0.05366 | ICAM1_E242_F  | 45578<br>77 | NM_0002<br>01.1    | ICAM1  | 3383      | 19 | 10243021      | 242  | Y | GGGAAGGAGGGGCTAGAGACAG[CG]ATTGAAAGGCAAC<br>AGCCAGTAGTTCCG    | cg20539223 |
| IGF2_E134_R   | 4106 | 0.91127 | 0.85927 | 0.02361 | IGF2_E134_R   | 64538<br>16 | NM_0006<br>12.2    | IGF2   | 3481      | 11 | 2116444       | 134  | Y | GGCAGGCGCACAGCGGGAGAGAACAGCA[CG]GAGAGA<br>AACAGAAAGCGTGAATTA | cg10649864 |
| MYOD1_P50_F   | 1565 | 0.83851 | 0.86642 | 0.09159 | IGF2_P103_6_R | 64538<br>16 | NM_0006<br>12.2    | IGF2   | 3481      | 11 | 2117614       | -709 | Y | CCACCAGGAGGCTGCACTGCGGGT[CG]CCCCGTCTGAG<br>TGCAGATGCAGT      | cg04741015 |
| IGF2AS_P203_F | 1110 | 0.85876 | 0.94487 | 0.15062 | IGF2AS_P203_F | 77059<br>72 | NM_0164<br>12.1    | IGF2AS | 5121<br>4 | 11 | 2118120       | -203 | Y | GGAAACCATCTCTGGAGAGTTTAA[CG]ATGTAAGAAA<br>GCACTGTGATTTTACC   | cg14188639 |
| PLXDC2_P914_R | 2776 | 0.77683 | 0.75237 | 0.03634 | IGFBP1_P12_R  | 6.2E+0<br>7 | NM_0010<br>13029.1 | IGFBP1 | 3484      | 7  | 45894472      | -12  | Y | CCTCCCACCGGTTT[CG]TAGGGCTTGGGTGCACT<br>AGCAAAACAAAC          | cg00110785 |
| IGFBP1_E48_R  | 4111 | 0.96022 | 0.96911 | 0.26009 | IGFBP1_E48_R  | 6.2E+0<br>7 | NM_0010<br>13029.1 | IGFBP1 | 3484      | 7  | 45894532      | 48   | Y | ATTTTGAACACTCAGCTCCTAGCGT[CG]GCGCTGCCAAT<br>CATTAACTCCTGGTGC | cg20666158 |
| IGFBP2_P306_F | 5664 | 0.91871 | 0.85053 | 0.03587 | IGFBP2_P306_F | 5.6E+0<br>7 | NM_0005<br>97.2    | IGFBP2 | 3485      | 2  | 21720606<br>6 | -306 | Y | AGGGGAAGCGCGAAACGAACTG[CG]CGAACTGAAC<br>TGAGAGCAGACAAAAG     | cg20018535 |
| IGFBP7_P371_F | 1111 | 0.90505 | 0.96992 | 0.02727 | IGFBP7_P371_F | 45046<br>18 | NM_0015<br>53.1    | IGFBP7 | 3490      | 4  | 57671667      | -371 | Y | AAACTTCTTAACAACCAACCGCTT[CG]AGACGATCCAGGGT<br>TTCATCTATTAATC | cg16546204 |
| SNURF_P2_R    | 2037 | 0.88547 | 0.83294 | 0.02871 | IGSF4_P45_4_F | 2.2E+0<br>7 | NM_0143<br>33.2    | IGSF4  | 2370<br>5 | 11 | 11488077<br>9 | -454 | Y | GCACACCGAGTGCATCTGGCCTAG[CG]AACCCAGACGTTG<br>CAAATTTCCGTCA   | cg05357252 |
| IHH_E186_F    | 5583 | 0.9627  | 0.95505 | 0.02377 | IHH_E186_F    | 5.1E+0<br>7 | NM_0021<br>81.1    | IHH    | 3549      | 2  | 21963324<br>7 | 186  | Y | TCTTGCTTCATAGCGTCCGCTGG[CG]CCAGGGTCTTCT<br>CGGGCACATTGGG     | cg27171516 |
| IL11_P11_R    | 4188 | 0.91231 | 0.90851 | 0.05576 | IL11_P11_R    | 2.4E+0<br>7 | NM_0006<br>41.2    | IL11   | 3589      | 19 | 60573637      | -11  | Y | GAGGCATGTGCCCTGAGCAGCAGGGCCG[CG]GCAGTGA<br>GGGAGTGTGGAC      | cg16546221 |
| ITPR2_P804_F  | 1248 | 0.89395 | 0.89754 | 0.12339 | IL16_P226_F   | 2.7E+0<br>7 | NM_0045<br>13.3    | IL16   | 3603      | 15 | 79262029      | -226 | N | TCAAGGAGGGCAGGAGTTGGAAG[CG]ACCGTTGTAAA<br>CGTTAAAGATTT       | cg12993983 |
| FLI1_E29_F    | 1337 | 0.96972 | 0.95441 | 0.09212 | IL6_P213_R    | 1.1E+0<br>7 | NM_0006<br>00.1    | IL6    | 3569      | 7  | 22733132      | -213 | N | TCTGCTTCTTAGCGCTAGCCTCAATGA[CG]ACCTAAGCTG<br>CACTTTTCCCCTAG  | cg13802710 |
| IL6_E168_F    | 4118 | 0.94221 | 0.92793 | 0.09103 | IL6_E168_F    | 1.1E+0<br>7 | NM_0006<br>00.1    | IL6    | 3569      | 7  | 22733513      | 168  | N | GTGTGGCCAGGGAGGGCTGG[CG]GGCGGCCAGCAGCA<br>GAGGCAGGC          | cg05401786 |
| INHA_P1144_R  | 5800 | 0.964   | 0.96469 | 0.02158 | INHA_P1144_R  | 92572<br>23 | NM_0021<br>91.2    | INHA   | 3623      | 2  | 22014405<br>4 | .    | Y | CGAGGCCCCAGCTGTGCC[CG]CCCTTCTCCACACCAC<br>TACA               | cg01858402 |
| INHA_P1189_F  | 5715 | 0.96511 | 0.9387  | 0.0218  | INHA_P1189_F  | 92572<br>23 | NM_0021<br>91.2    | INHA   | 3623      | 2  | 22014400<br>9 | .    | Y | GGTCAGCAGCAGGCCGTGCTCCGCGC[CG]TCCCGCGGA<br>AGCTCAGGC         | cg16613202 |
| CSF3R_P8_F    | 3463 | 0.94755 | 0.96665 | 0.24032 | INS_P248_F    | 45576<br>70 | NM_0002<br>07.1    | INS    | 3630      | 11 | 2139248       | -248 | N | CATTAGAGCTTAACCCAGGGCC[CG]GTGGCCAGACCTG<br>TCCCTGCTACA       | cg24338752 |
| KCNK4_E3_F    | 3534 | 0.94351 | 0.94582 | 0.16036 | KCNK4_E3_F    | 1.6E+0<br>7 | NM_0166<br>11.2    | KCNK4  | 5080<br>1 | 11 | 63815454      | 3    | Y | GAGATGCCAGATTAGCGTGGTGCCTG[CG]GAGAGACG<br>GGCCAGCTGATG       | cg01352108 |
| KDR_E79_F     | 800  | 0.88824 | 0.95652 | 0.01904 | KDR_E79_F     | 1.1E+0<br>7 | NM_0022<br>53.1    | KDR    | 3791      | 4  | 55686440      | 79   | Y | AGGCTGCCAGACGGACTTTCTGCGG[CG]CGCAAGTGTG<br>CCCGCCGAGGCAGA    | cg10740902 |
| KDR_P445_R    | 4232 | 0.92829 | 0.95367 | 0.17622 | KDR_P445_R    | 1.1E+0<br>7 | NM_0022<br>53.1    | KDR    | 3791      | 4  | 55686964      | -445 | Y | TGCAGCAGTTGGAGCCACAAGGGAGAAG[CG]GATACTC<br>AGCCAAGTATGCCGGTC | cg04695981 |
| KIT_P405_F    | 4020 | 0.95513 | 0.96721 | 0.0359  | KIT_P405_F    | 45576<br>94 | NM_0002<br>22.1    | KIT    | 3815      | 4  | 55218513      | -405 | Y | GAGCACCTGGCAGGTGGCGGGCC[CG]TGCCCTAACGTGT<br>GCGTGGTG         | cg27154163 |

|                             |      |         |         |         |                  |             |                 |        |           |    |               |       |   |                                                              |            |
|-----------------------------|------|---------|---------|---------|------------------|-------------|-----------------|--------|-----------|----|---------------|-------|---|--------------------------------------------------------------|------------|
| KIT_P367_R                  | 4019 | 0.93968 | 0.96288 | 0.04486 | KIT_P367_R       | 45576<br>94 | NM_0002<br>22.1 | KIT    | 3815      | 4  | 55218551      | -367  | Y | CGGTGGTGCCAGCTTCACAAAG[CG]AGCGGGCAGCACC<br>TCCTTGTGTCGG      | cg23927351 |
| L1CAM_P19_F                 | 5719 | 0.94991 | 0.95238 | 0.04188 | L1CAM_P1<br>9_F  | 1.3E+0<br>7 | NM_0240<br>03.1 | L1CAM  | 3897      | X  | 15279452<br>4 | -19   | Y | CAGCACAGCCAGCCGGGCT[CG]GTTCAAGGCTCCGGCCGG<br>AGGGG           | cg12024667 |
| LAT_E46_F                   | 3562 | 0.8336  | 0.86268 | 0.04238 | LAT_E46_F        | 6.3E+0<br>7 | NM_0143<br>87.3 | LAT    | 2704<br>0 | 16 | 28903694      | 46    | N | GGGTCTGGATATGGAGGCCA[CG]GCTGCCAGCTGGCA<br>GGTGGC             | cg03108875 |
| LOX_P71_F                   | 1309 | 0.95909 | 0.95786 | 0.14437 | LOX_P71_F        | 2.1E+0<br>7 | NM_0023<br>17.3 | LOX    | 4015      | 5  | 12144192<br>4 | -71   | Y | AGTTACACAAGCCGTTCTGGCC[CG]GCCGCCCTCAGCTA<br>TTTGTTCAC        | cg03619973 |
| LRP2_E20_F                  | 3574 | 0.94737 | 0.93714 | 0.02499 | LRP2_E20_F       | 68069<br>18 | NM_0045<br>25.1 | LRP2   | 4036      | 2  | 16992723<br>9 | 20    | Y | GCACCGGCAGCGCCTCTGCTAG[CG]AACGCTCCTTAGGT<br>CTGCACCTCCG      | cg10022744 |
| LY6G6E_P45_R                | 1321 | 0.87018 | 0.95067 | 0.16775 | LY6G6E_P4<br>5_R | 1.3E+0<br>7 | NM_0241<br>23.1 | LY6G6E | 7913<br>6 | 6  | 31789613      | -1499 | N | AATCTGGGAGAGGTGATCTGCACC[CG]AGATCCGGGA<br>TTTGTAGAGTT        | cg26399860 |
| MAF_P826_R                  | 4251 | 0.9752  | 0.95993 | 0.08062 | MAF_P826_R       | 7.3E+0<br>7 | NM_0053<br>60.3 | MAF    | 4094      | 16 | 78192938      | -826  | Y | GTGCCCTTGACAGAGCGAGCCCTATG[CG]AGATAACT<br>CCGGGGAAGCTCAA     | cg24274831 |
| MATK_P190_R                 | 5839 | 0.93549 | 0.8797  | 0.08751 | MATK_P19<br>0_R  | 2.1E+0<br>7 | NM_1393<br>55.1 | MATK   | 4145      | 19 | 3753000       | -190  | Y | CTCCCGGGCATAAGGAAGGAAG[CG]GGGCTGCAGGTA<br>CCGCCTG            | cg21380287 |
| MMP2_P303_R                 | 4151 | 0.9401  | 0.94071 | 0.02568 | MMP2_P30<br>3_R  | 7.6E+0<br>7 | NM_0045<br>30.2 | MMP2   | 4313      | 16 | 54070286      | -303  | Y | CCGGCGTCCCTCTAGTAGTAC[CG]CTGCTCTAACCTC<br>AGGACGTCAAGG       | cg20640526 |
| MMP2_E21_R                  | 925  | 0.94352 | 0.95435 | 0.05386 | MMP2_E21_R       | 7.6E+0<br>7 | NM_0045<br>30.2 | MMP2   | 4313      | 16 | 54070610      | 21    | Y | CGGCTGCCCTCCCTTGTTC[CG]CTGCATCCAGACTTCTC<br>AGGCGGT          | cg16119420 |
| MMP2_P197_F                 | 4307 | 0.91731 | 0.90587 | 0.02511 | MMP2_P19<br>7_F  | 7.6E+0<br>7 | NM_0045<br>30.2 | MMP2   | 4313      | 16 | 54070392      | -197  | Y | GCGAGAGAGGCAAGTGGGGTGA[CG]AGGTCGTGCACTG<br>AGGGTG            | cg20597545 |
| MSH2_P1008_F                | 2768 | 0.92087 | 0.9039  | 0.04807 | MSH2_P10<br>08_F | 45577<br>60 | NM_0002<br>51.1 | MSH2   | 4436      | 2  | 47482759      | -1008 | Y | ACTGGGATTATGGCGTGTGACACCA[CG]CCTGGCGTCAA<br>ACGTTTGTCTT      | cg20331910 |
| MT1A_P49_R                  | 1564 | 0.96753 | 0.95118 | 0.01084 | MT1A_P49_R       | 7.1E+0<br>7 | NM_0059<br>46.2 | MT1A   | 4489      | 16 | 55230030      | -49   | Y | GCAGGGCGGGTCTTTGCGTC[CG]GCCCTTTCCCTGA<br>CCATAA              | cg22243129 |
| MT1A_E13_R                  | 3695 | 0.86559 | 0.92754 | 0.05199 | MT1A_E13_R       | 7.1E+0<br>7 | NM_0059<br>46.2 | MT1A   | 4489      | 16 | 55230092      | 13    | Y | GCCCTACCAAGCCTTCCA[CG]TGCGCTTATAGCCTCTCA<br>ACTTCTTGCTT      | cg26001009 |
| MT1A_P600_F                 | 1563 | 0.94515 | 0.95914 | 0.16103 | MT1A_P60<br>0_F  | 7.1E+0<br>7 | NM_0059<br>46.2 | MT1A   | 4489      | 16 | 55229479      | -600  | Y | AGAGTGAGAGGCGACCCGTGTTC[CG]TGTTACTGTGT<br>ACGGAGTAGTGG       | cg10731123 |
| MYCN_E77_R                  | 4150 | 0.93173 | 0.84629 | 0.01851 | MYCN_E77_R       | 6.3E+0<br>7 | NM_0053<br>78.4 | MYCN   | 4613      | 2  | 15998211      | 77    | Y | GCCGAGCAAGCGCTAGCCAGG[CG]CAAGCGCACAGA<br>CTGTAGCATCC         | cg02204046 |
| MYH11_P22_F                 | 2152 | 0.97163 | 0.97665 | 0.02199 | MYH11_P2<br>2_F  | 1.3E+0<br>7 | NM_0228<br>44.1 | MYH11  | 4629      | 16 | 15858391      | -22   | Y | GGAGCGTCCAAATCTCCCTG[CG]CGTCTCGGACGCTCT<br>CTTATAGAC         | cg15581089 |
| MYH11_P236_R                | 2403 | 0.95965 | 0.91829 | 0.02509 | MYH11_P2<br>36_R | 1.3E+0<br>7 | NM_0228<br>44.1 | MYH11  | 4629      | 16 | 15858605      | -236  | Y | GCACCGCACAAGGGCGCACGGAACAGGTG[CG]CACAGG<br>GACGGGAGTCTCAGCCC | cg21571155 |
| NEFL_P209_R                 | 1596 | 0.95645 | 0.92109 | 0.02391 | NEFL_P209_R      | 54537<br>61 | NM_0061<br>58.1 | NEFL   | 4747      | 8  | 24870155      | -209  | Y | GGGGCAGCGCGTCTGCAGCCAAGG[CG]AGGATTCTG<br>CGCAAAAGGGA         | cg05876319 |
| NEFL_E23_R                  | 3711 | 0.94225 | 0.92657 | 0.09619 | NEFL_E23_R       | 54537<br>61 | NM_0061<br>58.1 | NEFL   | 4747      | 8  | 24869923      | 23    | Y | CGCCGCTGTAGGAGGTGAGTAGTA[CG]GCTGTAGCT<br>GAAGAACTCATG        | cg00987688 |
| HIC-<br>1_seq_48_S103<br>_R | 6059 | 0.94617 | 0.95574 | 0.16664 | NES_P239_R       | 3.8E+0<br>7 | NM_0066<br>17.1 | NES    | 1076<br>3 | 1  | 15491405<br>2 | -239  | N | GAGGCTGTGAAGAAGGGTCAATCC[CG]AAAAAGGC<br>AGATAATGCACAGAACTGA  | cg17059112 |
| NGFB_E353_F                 | 3030 | 0.96376 | 0.97219 | 0.01931 | NGFB_E353_F      | 7.1E+0<br>7 | NM_0025<br>06.2 | NGFB   | 4803      | 1  | 11568202<br>7 | 353   | Y | CGCGTTATCCACTTCTAGCCCT[CG]AGTAGACCTGGCA<br>TGGCCGTGGGCTTCT   | cg02459758 |
| NGFB_P13_F                  | 2157 | 0.95643 | 0.96631 | 0.19021 | NGFB_P13_F       | 7.1E+0<br>7 | NM_0025<br>06.2 | NGFB   | 4803      | 1  | 11568239<br>3 | -13   | Y | CCAGCGTCTCTGCTGTGCGGAG[CG]CCGAGCTGCTCTC<br>ACACAGGCTTCTGAA   | cg11660906 |



|                    |      |         |         |         |                    |         |              |             |        |    |           |       |      |                                                       |                                                       |            |
|--------------------|------|---------|---------|---------|--------------------|---------|--------------|-------------|--------|----|-----------|-------|------|-------------------------------------------------------|-------------------------------------------------------|------------|
| NPR2_P618_F        | 2439 | 0.90643 | 0.78266 | 0.02158 | NPR2_P618_F        | 7.4E+07 | NM_0039_95.3 | NPR2        | 4882   | 9  | 35781788  | -618  | Y    | CGCCGTAGCTCCGGATGGGACCAG[CG]CCCAGGCCCCGTTAGTCCAAGCAGG | cg02519855                                            |            |
| NTRK3_E131_F       | 991  | 0.95185 | 0.96127 | 0.03736 | NTRK3_E131_F       | 6E+07   | NM_0025_30.2 | NTRK3       | 4916   | 15 | 86600534  | 131   | Y    | CCTCTGCCTTTGAAACGCCGAG[CG]ATCAGATGCAAAATCCTTCAGCGTCTG | cg00865584                                            |            |
| NTRK3_P752_F       | 4957 | 0.89453 | 0.92387 | 0.03437 | NTRK3_P752_F       | 6E+07   | NM_0025_30.2 | NTRK3       | 4916   | 15 | 86601417  | -752  | Y    | CCTTCCACTTTTTGGCCCT[CG]CGCTACCCGGTTTTGCTGCAATCCGGA    | cg09147530                                            |            |
| NTRK3_P636_R       | 4224 | 0.93452 | 0.90313 | 0.02844 | NTRK3_P636_R       | 6E+07   | NM_0025_30.2 | NTRK3       | 4916   | 15 | 86601301  | -636  | Y    | CGCTAGCCGAGCCCGGGGAAAC[CG]AGACCGAAGGGAAAAAGTTGCA      | cg25116345                                            |            |
| OGG1_E400_F        | 936  | 0.92978 | 0.96373 | 0.09427 | OGG1_E400_F        | 8670539 | NM_0168_28.1 | OGG1        | 4968   | 3  | 9766105   | 400   | Y    | GATGGAGTATGGAAGAATGCCAAGA[CG]GCAGGCAGCAGCTGTGCCGGCC   | cg10816847                                            |            |
| OPCML_E219_R       | 3737 | 0.93948 | 0.95663 | 0.03191 | OPCML_E219_R       | 6E+07   | NM_0025_45.3 | OPCML       | 4978   | 11 | 13290739  | 4     | 219  | Y                                                     | TGGGATGAAGAGCAGGGCAGTTGT[CG]CCGAGAAGACGACCCAGTAGGCAGG | cg19151121 |
| P2RX7_P597_F       | 2173 | 0.89004 | 0.96614 | 0.15883 | P2RX7_P597_F       | 3.4E+07 | NM_1774_27.2 | P2RX7       | 5027   | 12 | 12005446  | 4     | -597 | N                                                     | TTGGCTGATTGGTCTAGGTATAGAT[CG]ACCTGCCGGGGTGCAGAGG      | cg08688169 |
| PALM2-AKAP2_P420_R | 5114 | 0.95722 | 0.93943 | 0.02282 | PALM2-AKAP2_P420_R | 2.2E+07 | NM_1471_50.1 | PALM2-AKAP2 | 445815 | 9  | 111581990 | -550  | Y    | GGGTCCACATTCGGTCAGA[CG]CCCCTCCTACTGGCATCTGCC          | cg12992456                                            |            |
| PALM2-AKAP2_P183_R | 5117 | 0.9177  | 0.88537 | 0.06245 | PALM2-AKAP2_P183_R | 2.2E+07 | NM_1471_50.1 | PALM2-AKAP2 | 445815 | 9  | 111582227 | -313  | Y    | GGTCCATCACACTCCAGGGG[CG]GAGCGAGGCACCGAGACGTCAGGGC     | cg21898539                                            |            |
| PAX6_P50_R         | 1665 | 0.93757 | 0.94407 | 0.02166 | PAX6_P50_R         | 7.1E+07 | NM_0016_04.3 | PAX6        | 5080   | 11 | 31789505  | -50   | Y    | GCTTTATGCAAAGCAGCGCCGGGGCCT[CG]CGCCAGCCGATTGGATGCTCCC | cg06727689                                            |            |
| PDE1B_P263_R       | 2612 | 0.96781 | 0.96626 | 0.03136 | PDE1B_P263_R       | 2.4E+07 | NM_0009_24.2 | PDE1B       | 5153   | 12 | 53229408  | -263  | Y    | CGCCTCCGCTGCACTCTGTAACA[CG]CACTCACATCCGCAGTACAGGGC    | cg06901488                                            |            |
| PDGFRA_P1429_F     | 4234 | 0.85915 | 0.88732 | 0.02896 | PDGFRA_P1429_F     | 6.2E+07 | NM_0062_06.3 | PDGFRA      | 5156   | 4  | 54788775  | -1429 | Y    | GCTGAAGATGCACGAGAGCGGTTCTG[CG]TAGAAGAAGTCCGCAATGGC    | cg27645880                                            |            |
| PDGFRB_P343_F      | 2808 | 0.88897 | 0.87776 | 0.01664 | PDGFRB_P343_F      | 6.8E+07 | NM_0026_09.3 | PDGFRB      | 5159   | 5  | 149515958 | -343  | Y    | CACTTTCCGATGCCATGT[CG]GGTGGCGCCCTCCCTTGCATGGC         | cg25440811                                            |            |
| PDGFRB_E195_R      | 4153 | 0.92604 | 0.90477 | 0.04758 | PDGFRB_E195_R      | 6.8E+07 | NM_0026_09.3 | PDGFRB      | 5159   | 5  | 149515420 | 195   | N    | AAGCATCCTTCGGGAGGAGCAGAGC[CG]CCAGAGGGGC               | cg21817429                                            |            |
| PDGFRB_P273_F      | 2810 | 0.82161 | 0.89512 | 0.10057 | PDGFRB_P273_F      | 6.8E+07 | NM_0026_09.3 | PDGFRB      | 5159   | 5  | 149515888 | -273  | Y    | CTTAGAAATTCACAGCCA[CG]CCAGCCGCCAGCTGCTGAGTCACTTTT     | cg12727795                                            |            |
| PENK_E26_F         | 3752 | 0.95902 | 0.95171 | 0.0422  | PENK_E26_F         | 4E+07   | NM_0062_11.2 | PENK        | 5179   | 8  | 57521117  | 26    | Y    | TTGAGCCTGCCTGGGCGAGAA[CG]GGGTCCCTCGGCAAGACCTC         | cg25021837                                            |            |
| PENK_P447_R        | 1678 | 0.84465 | 0.88918 | 0.0376  | PENK_P447_R        | 4E+07   | NM_0062_11.2 | PENK        | 5179   | 8  | 57521590  | -447  | Y    | CAAATTGAAAAGCCGGTTTCAGACA[CG]ACTCTAGAGGGAAGAGAAGAAG   | cg07433146                                            |            |
| PI3_E107_F         | 3778 | 0.80627 | 0.91406 | 0.07173 | PI3_E107_F         | 3.2E+07 | NM_0026_38.2 | PI3         | 5266   | 20 | 43237019  | 107   | N    | CTTGATCGTGGTGGTTCCTCAT[CG]CTGGGACGCTGGTTCTAGAG        | cg17976697                                            |            |
| PLXDC1_E71_F       | 2871 | 0.8306  | 0.85677 | 0.02792 | PLXDC1_E71_F       | 2.1E+07 | NM_0204_05.3 | PLXDC1      | 57125  | 17 | 34561227  | 71    | Y    | AGCTCGCCTCGCATGGTGGGTGCC[CG]GACCTGCCCCCGGCTGCTGCTG    | cg26456838                                            |            |
| PLXDC1_P236_F      | 2732 | 0.91293 | 0.96019 | 0.13789 | PLXDC1_P236_F      | 2.1E+07 | NM_0204_05.3 | PLXDC1      | 57125  | 17 | 34561534  | -236  | Y    | CGCCTGCCCTCAGCCCTAA[CG]GAGCGCTCCCTAGAGCTCTGACCC       | cg21125376                                            |            |
| PLXDC2_E337_F      | 3051 | 0.97407 | 0.9719  | 0.03212 | PLXDC2_E337_F      | 4E+07   | NM_0328_12.7 | PLXDC2      | 84898  | 10 | 20145715  | 337   | Y    | GCTGCCGAGTGAACCGACAGTTTG[CG]AGCCTCGGCTGCAAGTGGCCTC    | cg16953926                                            |            |
| POMC_P53_F         | 1741 | 0.95149 | 0.962   | 0.01463 | POMC_P53_F         | 4505948 | NM_0009_39.1 | POMC        | 5443   | 2  | 25245009  | -53   | Y    | ACTTCCGAGCTCTCTGGTGGGCG[CG]GGACTTTGACCTTCCCGGAGCAC    | cg00293936                                            |            |
| POMC_P400_R        | 1743 | 0.95313 | 0.96328 | 0.09494 | POMC_P400_R        | 4505948 | NM_0009_39.1 | POMC        | 5443   | 2  | 25245356  | -400  | Y    | TGGTTCGATTTGGCGGTAATATCAC[CG]TCTGCACAGGGAGGCCTCC      | cg22632966                                            |            |

|                   |      |         |         |         |                   |         |               |          |       |    |           |      |     |                                                       |                                       |            |
|-------------------|------|---------|---------|---------|-------------------|---------|---------------|----------|-------|----|-----------|------|-----|-------------------------------------------------------|---------------------------------------|------------|
| PROK2_P390_F      | 1765 | 0.95823 | 0.95534 | 0.01635 | PROK2_P390_F      | 2.4E+07 | NM_021935.2   | PROK2    | 60675 | 3  | 71917292  | -390 | Y   | CCGGAACCGCTTTTGTGGTCTC[CG]AGACACTCATTGTCTCCTGGTTTCCAA | cg01645467                            |            |
| PROK2_E0_F        | 3826 | 0.87788 | 0.91728 | 0.01957 | PROK2_E0_F        | 2.4E+07 | NM_021935.2   | PROK2    | 60675 | 3  | 71916902  | 0    | Y   | CAGGCTCCTCATGGCCCT[CG]GGACTGGGCGGCCCGCCGGAGGCAG       | cg12848837                            |            |
| PTCH2_P37_F       | 5025 | 0.97279 | 0.96675 | 0.05367 | PTCH2_P37_F       | 5.2E+07 | NM_003738.3   | PTCH2    | 8643  | 1  | 45081240  | -37  | Y   | CCCAACCCGCGTTATCTGGG[CG]CTCCATAGGCTAGCCC              | cg02059556                            |            |
| PTPRH_P255_F      | 5067 | 0.94259 | 0.91241 | 0.12495 | PTPRH_P255_F      | 6.7E+07 | NM_002842.2   | PTPRH    | 5794  | 19 | 60412909  | -255 | N   | TGACCCAGGTACCGGTGC[CG]CGCCCACTGCTGCA                  | cg17314748                            |            |
| PURA_P928_R       | 5960 | 0.94219 | 0.8783  | 0.0283  | PURA_P928_R       | 6.3E+07 | NM_005859.3   | PURA     | 5813  | 5  | 139472964 | -928 | Y   | GCCCTGGTGCCTACTGCTCTGCT[CG]GCTCCCCCA                  | cg13473072                            |            |
| RARB_E114_F       | 4165 | 0.96889 | 0.97305 | 0.05175 | RARB_E114_F       | 1.5E+07 | NM_016152.2   | RARB     | 5915  | 3  | 25444872  | 114  | Y   | GAGGACTGGGATGCCGAGAACG[CG]AGCGATCCGAGCA               | cg14265392                            |            |
| ASCL1_E24_F       | 3014 | 0.95371 | 0.93388 | 0.0199  | RARB_P60_F        | 1.5E+07 | NM_016152.2   | RARB     | 5915  | 3  | 25444698  | -60  | Y   | CTAGTTGGGTCATTGAAGTTAGCAGCC[CG]GGTAGGG                | cg06720425                            |            |
| RASGRF1_E16_F     | 3860 | 0.96776 | 0.96739 | 0.01408 | RASGRF1_E16_F     | 2.5E+07 | NM_002891.3   | RASGRF1  | 5923  | 15 | 77169879  | 16   | Y   | GCGACGTGGCCATCATTGAGC[CG]GATCCCTCTGTCATG              | cg16752670                            |            |
| RET_seq_53_S374_F | 6099 | 0.78711 | 0.77199 | 0.0153  | RET_seq_53_S374_F | 5.1E+07 | NM_020630.3   | RET      | 5979  | 10 | 42892087  | -446 | Y   | GCGGGTGCACCCGAGCAGT[CG]GCCAGACCTGCAT                  | cg01812049                            |            |
| SCGB3A1_E55_R     | 3888 | 0.97154 | 0.95776 | 0.03947 | SCGB3A1_E55_R     | 5E+07   | NM_052863.2   | SCGB3A1  | 92304 | 5  | 179951038 | 55   | Y   | CTACCGGAGCTGACGAGACGGGCCA[CG]CAGAGCCCCA               | cg19421379                            |            |
| SCGB3A1_P103_R    | 1883 | 0.89138 | 0.90797 | 0.0991  | SCGB3A1_P103_R    | 5E+07   | NM_052863.2   | SCGB3A1  | 92304 | 5  | 179951196 | -103 | Y   | GCGTCTGAGAAAGCCCTGCCGCT[CG]CTCACGGCC                  | cg11379125                            |            |
| SEPT5_P441_F      | 5988 | 0.80378 | 0.85643 | 0.02082 | SEPT5_P441_F      | 5.8E+07 | NM_00109939.1 | SEPT5    | 5413  | 22 | 18081546  | -441 | Y   | GTCTGCTCGCAGCAGGTCTGCGCAGCAC[CG]AGCGGT                | cg11788728                            |            |
| SEPT9_P58_R       | 6002 | 0.9611  | 0.96435 | 0.02458 | SEPT9_P58_R       | 2E+07   | NM_006640.2   | SEPT9    | 10801 | 17 | 72827686  | -58  | Y   | CCGGTGGTCTGCCGACTCCT[CG]GGGCCACTTCGGGC                | cg05428394                            |            |
| GJB2_P791_R       | 897  | 0.9011  | 0.84682 | 0.08744 | SERPINA5_E69_F    | 3.4E+07 | NM_000624.3   | SERPINA5 | 5104  | 14 | 94117633  | 69   | N   | CCCAGGCTTGAGGGCATGTGAGG[CG]AGGAGAGGATG                | cg08764227                            |            |
| SEZ6L_P299_F      | 1931 | 0.91061 | 0.93923 | 0.01792 | SEZ6L_P299_F      | 5.6E+07 | NM_021115.3   | SEZ6L    | 23544 | 22 | 24895181  | -299 | Y   | TGGCCAGGCAGAGCTGCTGGGAG[CG]TCAGCAGGAGAGA              | cg09131631                            |            |
| SEZ6L_P249_F      | 1935 | 0.94926 | 0.90339 | 0.02042 | SEZ6L_P249_F      | 5.6E+07 | NM_021115.3   | SEZ6L    | 23544 | 22 | 24895231  | -249 | Y   | GCTCCAGGACGCAAGGGGAATTGG[CG]TTAACTTTGC                | cg20207331                            |            |
| SFRP1_E398_R      | 3910 | 0.96365 | 0.95574 | 0.01458 | SFRP1_E398_R      | 5.6E+07 | NM_003012.3   | SFRP1    | 6422  | 8  | 41285739  | 398  | Y   | TGTCGACTGGAAGCTCACGTAGTCTGACT[CG]CTGGCC               | cg27086426                            |            |
| SFRP1_P157_F      | 1946 | 0.93621 | 0.94547 | 0.01521 | SFRP1_P157_F      | 5.6E+07 | NM_003012.3   | SFRP1    | 6422  | 8  | 41286294  | -157 | Y   | GCGGTTTCGTTTACTAGAACCAGA[CG]CGGCTCAACAC               | cg15881237                            |            |
| SFTPA1_E340_R     | 3913 | 0.83449 | 0.96792 | 0.05811 | SFTPA1_E340_R     | 3.9E+07 | NM_005411.3   | SFTPA1   | 6435  | 10 | 81361004  | 340  | N   | GGGGCCAGGCTGCGGGCC[CG]TTCATCTTTTTTCTTCT               | cg17981088                            |            |
| SGCE_P250_R       | 1969 | 0.9236  | 0.93371 | 0.02864 | SGCE_P250_R       | 1.1E+07 | NM_003919.1   | SGCE     | 8910  | 7  | 94123664  | 40   | Y   | GGTGTGTGTCGAAGAACTGACTG[CG]CCCTGAGGAGA                | cg26050163                            |            |
| CYP2E1_E53_R      | 5510 | 0.89768 | 0.86957 | 0.11266 | SHH_E328_F        | 2.1E+07 | NM_000193.2   | SHH      | 6469  | 7  | 15529740  | 0    | 328 | Y                                                     | GATCTTCCCTTACACTT[CG]CTGGCCTAGGGTCTTC | cg02023134 |
| IHH_P246_R        | 4944 | 0.89263 | 0.79082 | 0.0474  | SHH_P104_R        | 2.1E+07 | NM_000193.2   | SHH      | 6469  | 7  | 155297832 | -104 | Y   | ATGGCAGGCTGCCGGCGCTGATAA[CG]GAACACATCGG               | cg06981396                            |            |
| SLC22A3_E122_R    | 3926 | 0.95052 | 0.95329 | 0.02129 | SLC22A3_E122_R    | 2.4E+07 | NM_021977.2   | SLC22A3  | 6581  | 6  | 160689537 | 122  | Y   | CTGCTGTGCTGACGGGCTCACCTT[CG]CCTTCTCTTC                | cg01037838                            |            |
| SLC6A8_P193_R     | 2016 | 0.81747 | 0.80866 | 0.06519 | SLC6A8_P193_R     | 5032096 | NM_005629.1   | SLC6A8   | 6535  | X  | 152606393 | -193 | Y   | GTAGCAACCTCTGCTCC[CG]CTGGAGCGGCTCTCCT                 | cg19792609                            |            |

|                     |      |         |         |         |                     |         |              |         |      |    |          |       |   |                                                               |            |
|---------------------|------|---------|---------|---------|---------------------|---------|--------------|---------|------|----|----------|-------|---|---------------------------------------------------------------|------------|
| FLT1_E444_F         | 515  | 0.89118 | 0.91121 | 0.17518 | SMAD2_P8_48_R       | 5.1E+07 | NM_0059_01.3 | SMAD2   | 4087 | 18 | 43712069 | -848  | Y | GGGTCTTGGAGAGCACTTAGGGCC[CG]GGTAGGGGATGCCAGGTATAA             | cg02100834 |
| SNRPN_seq_18_S99_F  | 6124 | 0.93254 | 0.95828 | 0.02789 | SNRPN_seq_18_S99_F  | 3E+07   | NM_0228_06.2 | SNRPN   | 6638 | 15 | 22751285 | 57    | Y | CGCATCTGTCTGAGGAGCGGTCACTGTA[CG]CGATGGAGCGGGCAAGGTCACTGTGCCGG | cg10146073 |
| SNRPN_seq_12_S127_F | 6123 | 0.95967 | 0.93338 | 0.04561 | SNRPN_seq_12_S127_F | 3E+07   | NM_0228_06.2 | SNRPN   | 6638 | 15 | 22751217 | -11   | Y | GTGTGCGAAGCCTGCCGTGTCTGAG[CG]AGTCTGGCGCAGAGTGGAGCG            | cg05182424 |
| SNURF_E256_R        | 3937 | 0.94436 | 0.94727 | 0.03019 | SNURF_E256_R        | 3E+07   | NM_0056_78.3 | SNURF   | 8926 | 15 | 22751484 | 256   | Y | AGGCTTGTCTGTTGTCGGTTCTGCC[CG]ATGGTATCTGTCCGCTCGATTGGGGCG      | cg07995992 |
| SNURF_P78_F         | 2035 | 0.9684  | 0.96586 | 0.10681 | SNURF_P78_F         | 3E+07   | NM_0056_78.3 | SNURF   | 8926 | 15 | 22751150 | -78   | Y | CCTGCACTGCGGCAAAACAGCACGCTGCG[CG]GCCGCAAGAGGAGCTGGCC          | cg15999943 |
| CCND2_P887_F        | 2329 | 0.88177 | 0.87764 | 0.10202 | SOD3_P460_R         | 4507150 | NM_0031_02.1 | SOD3    | 6649 | 4  | 24404693 | -460  | N | TAGCACAAAGTCTAGAATACCAGAA[CG]GAGACGTGCTTCTTGACCTTAAACGAAA     | cg16986592 |
| SOX1_P294_F         | 5935 | 0.82265 | 0.92925 | 0.08852 | SOX1_P294_F         | 3E+07   | NM_0059_86.2 | SOX1    | 6656 | 13 | 11176962 | -294  | Y | GGGCCGGGCCAGCGCACCCGCTCC[CG]GCCCAAAAGCGGAGCTGCAACT            | cg23071766 |
| SOX1_P1018_R        | 5941 | 0.86896 | 0.88147 | 0.12704 | SOX1_P1018_R        | 3E+07   | NM_0059_86.2 | SOX1    | 6656 | 13 | 11176889 | -1018 | Y | CACGACGATCCTTTCTTAGTCTT[CG]CTTTTCAACCAATCGTTAATCATT           | cg14311093 |
| SOX17_P287_R        | 5958 | 0.92088 | 0.96132 | 0.04578 | SOX17_P287_R        | 3.1E+07 | NM_0224_54.2 | SOX17   | 6432 | 8  | 55532761 | -287  | Y | TTCATCTAAACGACCTTGGGCAAGTA[CG]TCGATTCCAAGGTACAATCAGCC         | cg19346665 |
| SOX17_P303_F        | 5943 | 0.88557 | 0.92136 | 0.07668 | SOX17_P303_F        | 3.1E+07 | NM_0224_54.2 | SOX17   | 6432 | 8  | 55532745 | -303  | Y | GAATGGACGCTCGGTATGTTTCATCTAAA[CG]ACCTGGGCAAGTACGTCGATT        | cg09626193 |
| SPARC_P195_F        | 5009 | 0.88781 | 0.92023 | 0.16724 | SPARC_P195_F        | 4.9E+07 | NM_0031_18.2 | SPARC   | 6678 | 5  | 15104690 | -195  | N | ACCCTGCCTGCCTCATCTGTT[CG]GGGCTGCTGCCTAAACCGACTCACAGAG         | cg01524697 |
| PARP1_P610_R        | 5915 | 0.83663 | 0.83248 | 0.03113 | ST6GAL1_P528_F      | 2.8E+07 | NM_1732_16.1 | ST6GAL1 | 6480 | 3  | 18813068 | -528  | Y | GCCGGTAGCAGAGACCGGGTGTACAGCAC[CG]CATGTTAGGACAAAAGCCGGACACTG   | cg27158598 |
| STK23_E182_R        | 3962 | 0.95656 | 0.95889 | 0.07526 | STK23_E182_R        | 6.3E+07 | NM_0143_70.2 | STK23   | 2657 | 6  | 15269988 | 182   | Y | CACAGCCTCCTGCGGGCC[CG]AGTCTCGGGCTCCGAACTAGCCC                 | cg02910024 |
| STK23_P24_F         | 2059 | 0.93619 | 0.89725 | 0.04122 | STK23_P24_F         | 6.3E+07 | NM_0143_70.2 | STK23   | 2657 | 6  | 15269968 | -24   | Y | GCCAAGGCTATAAATTCGCAGGCCGCGG[CG]GGCCCCACAGGACGCGCCCG          | cg15753733 |
| TAL1_P594_F         | 5221 | 0.87274 | 0.96185 | 0.0539  | TAL1_P594_F         | 4507362 | NM_0031_89.1 | TAL1    | 6886 | 1  | 47468624 | -594  | Y | TCACACATCGAAGTCTTGATTAAC[CG]AAGGCTCCTTCTATTTGCCGCGCTT         | cg13537642 |
| TAL1_E122_F         | 1055 | 0.85792 | 0.82896 | 0.09433 | TAL1_E122_F         | 4507362 | NM_0031_89.1 | TAL1    | 6886 | 1  | 47467908 | 122   | Y | CCGACAGGCTGTCTGGAACATTTT[CG]AACCTCCAACCTGGATCGGTCTGGTT        | cg00875272 |
| TBX1_P885_R         | 5961 | 0.95466 | 0.96698 | 0.07874 | TBX1_P885_R         | 1.8E+07 | NM_0806_46.1 | TBX1    | 6899 | 22 | 18123341 | -885  | Y | CTCAGTCTCCCTTTGCACGGT[CG]CGGCGGAGCCCGATTCTGCTCTCTCC           | cg03402455 |
| TCF4_P175_R         | 5246 | 0.9061  | 0.88891 | 0.04648 | TCF4_P175_R         | 4507398 | NM_0031_99.1 | TCF4    | 6925 | 18 | 51406615 | -175  | Y | TCGGGCAGGCTAGGATGATCCCCCT[CG]CACCCACCCCGAGGGGAAAAA            | cg19706341 |
| TERT_P360_R         | 2885 | 0.95768 | 0.96113 | 0.04814 | TERT_P360_R         | 3.8E+07 | NM_1982_55.1 | TERT    | 7015 | 5  | 1348519  | -360  | Y | CGAGGGCCCCAGCGGAGAGAGGT[CG]AATCGGCCTAGGCTGTGGG                | cg17903235 |
| TGFBI_P31_R         | 5310 | 0.88314 | 0.83699 | 0.02027 | TGFBI_P31_R         | 4507466 | NM_0003_58.1 | TGFBI   | 7045 | 5  | 13539256 | -31   | Y | GCTTACTTAACCTGCCCCGGGCGG[CG]GAGCGCTCTCATCTCCCTGGAGCC          | cg07852148 |
| THPO_P585_R         | 5322 | 0.93472 | 0.92072 | 0.21166 | THPO_P585_R         | 4.1E+07 | NM_1992_28.1 | THPO    | 7066 | 3  | 18557921 | -585  | N | TGTCAGGTGCGGGGCACATGTATGTG[CG]CACACGTGCACTGGGTTAAGCCTGAG      | cg20482454 |
| THY1_P149_R         | 5973 | 0.88663 | 0.90083 | 0.11095 | THY1_P149_R         | 2E+07   | NM_0062_88.2 | THY1    | 7070 | 11 | 11879923 | -149  | Y | GGAAGGAAGAGAAGCGGTC[CG]CATTGGTGTGAGAGTGGCAGG                  | cg18809507 |
| TIMP3_seq_7_S38_F   | 6126 | 0.96726 | 0.96024 | 0.05882 | TIMP3_seq_7_S38_F   | 7.6E+07 | NM_0003_62.4 | TIMP3   | 7078 | 22 | 31527437 | .     | Y | GAGGGCTCCGCTCCGAGGACCCAG[CG]GCAAGCACCCGGTCCCGGC               | cg04421373 |

|                 |      |         |         |         |                 |         |             |          |        |    |           |      |   |                                                          |            |
|-----------------|------|---------|---------|---------|-----------------|---------|-------------|----------|--------|----|-----------|------|---|----------------------------------------------------------|------------|
| TNFRSF1B_P167_F | 5170 | 0.91373 | 0.94359 | 0.01325 | TNFRSF1B_P167_F | 2.3E+07 | NM_001066.2 | TNFRSF1B | 7133   | 1  | 12149480  | -167 | Y | GGTACCCGAGTGCTGGGAGTGA[CG]CTGGAGGTATCGGCCAGCGAT          | cg20587042 |
| TNFRSF1B_E5_F   | 1331 | 0.96771 | 0.9605  | 0.13626 | TNFRSF1B_E5_F   | 2.3E+07 | NM_001066.2 | TNFRSF1B | 7133   | 1  | 12149652  | 5    | Y | TCGCTTTAGTTCGAGGGCTAGCGAG[CG]CAGCGGAGCCTGGAGAGAAAGG      | cg06978331 |
| TP73_P945_F     | 2932 | 0.90572 | 0.89516 | 0.08019 | TP73_P945_F     | 4885644 | NM_005427.1 | TP73     | 7161   | 1  | 3558044   | -945 | Y | GTGTGCTGCGCCGGTAGAGAGCTT[CG]GCCTGACCTAGCGCAGGTCTGG       | cg21323562 |
| TRIM29_E189_F   | 2952 | 0.94328 | 0.79102 | 0.0393  | TRIM29_E189_F   | 1.7E+07 | NM_012101.2 | TRIM29   | 23650  | 11 | 119513884 | 189  | Y | CAGGCTGCCACTGGGGCCCGA[CG]GGCTCCGGGCATCCCTGGCTTCTGGG      | cg26414304 |
| TRPM5_P721_F    | 2153 | 0.88281 | 0.87503 | 0.14548 | TRPM5_P721_F    | 2.4E+07 | NM_014555.2 | TRPM5    | 29850  | 11 | 2401572   | -721 | N | GGCTCATGTCTCCAGCTGCC[CG]GTGAGTTCGGGCATCTCAGCCCT          | cg03982381 |
| IGFBP7_P297_F   | 1124 | 0.9499  | 0.91617 | 0.03955 | TSC2_E140_F     | 1.1E+07 | NM_000548.2 | TSC2     | 7249   | 16 | 2038740   | 140  | N | AGAGGGTAAACAGACGGAGTTTATCATCAC[CG]CGGAAATACTGAGAGTGAGTGA | cg01052512 |
| TSP50_P137_F    | 2158 | 0.93517 | 0.94251 | 0.01257 | TSP50_P137_F    | 3.2E+07 | NM_013270.2 | TSP50    | 29122  | 3  | 46734505  | -137 | Y | GCTCGTGTGTCTGACCCGCAAGGG[CG]CCCCTAGTGACAGCCCTCCCTATA     | cg13403573 |
| TSP50_E21_R     | 3987 | 0.94448 | 0.94389 | 0.06955 | TSP50_E21_R     | 3.2E+07 | NM_013270.2 | TSP50    | 29122  | 3  | 46734347  | 21   | Y | GGGTGGCAGCCGACTGCGTCTCT[CG]GAAGGCGCTCCCAGTGCCTCC         | cg07522405 |
| TUSC3_E29_R     | 3992 | 0.96571 | 0.95567 | 0.02158 | TUSC3_E29_R     | 3E+07   | NM_178234.1 | TUSC3    | 7991   | 8  | 15442130  | 29   | Y | CAGGTCTTCTCCCGTGAA[CG]GATGCTCTGTAGTCTCTCCTCTGCGTC        | cg10249582 |
| GALR1_P80_F     | 889  | 0.87988 | 0.79426 | 0.0251  | USP29_E274_F    | 5.7E+07 | NM_020903.2 | USP29    | 57663  | 19 | 62323595  | 274  | N | GATGACTTGAGCCTTGGGAT[CG]AGGGTGTAGTGAGGTATGATC            | cg07368873 |
| WNT1_P79_R      | 6115 | 0.88448 | 0.87282 | 0.07817 | WNT1_P79_R      | 1.7E+07 | NM_005430.2 | WNT1     | 7471   | 12 | 47658424  | -79  | Y | CCATTGTCTGCGCCCTAAC[CG]GTGCGCCTGTGCCACAGTGCCTCC          | cg08133093 |
| WNT5A_P655_F    | 5397 | 0.93935 | 0.94768 | 0.04191 | WNT5A_P655_F    | 4.1E+07 | NM_003392.3 | WNT5A    | 7474   | 3  | 55497026  | -655 | Y | CGTATCCCGTTCTTTCTCTTT[CG]GGTTGATCTCTTTTCCCGTTTT          | cg19344602 |
| WT1_E32_F       | 4207 | 0.92266 | 0.95388 | 0.01654 | WT1_E32_F       | 6.6E+07 | NM_024424.2 | WT1      | 7490   | 11 | 32413631  | 32   | Y | CGGAGAGCCCCGGGTGTGGG[CG]CTGCCTGAACCTCTTACCCAGCTG         | cg20134916 |
| XRCC1_P681_R    | 5328 | 0.92803 | 0.9665  | 0.03636 | XRCC1_P681_R    | 5454171 | NM_006297.1 | XRCC1    | 7515   | 19 | 48772236  | -681 | Y | GGCTAGGACAGCAAATCTGAGTGAATTTT[CG]TAGTTTCGTAGGGAACCTGGATT | cg12562082 |
| ZIM2_P22_F      | 2198 | 0.92699 | 0.94021 | 0.14451 | ZIM2_P22_F      | 3.3E+07 | NM_015363.3 | ZIM2     | 23619  | 19 | 62043909  | -22  | Y | GCAGCTGCCAGACTTCTGCAC[CG]AGGTGCAGCTCGACGCCTCTGTCA        | cg01034638 |
| ZIM3_E203_F     | 4010 | 0.79602 | 0.95733 | 0.09578 | ZIM3_E203_F     | 1.6E+07 | NM_052882.1 | ZIM3     | 114026 | 19 | 62348179  | 203  | N | AAAACCTAATCGGCCCTTACC[CG]CTGATTCCGCATCATAATCCAGTCAA      | cg22057816 |
| CRIP1_P874_R    | 403  | 0.94593 | 0.90209 | 0.06005 | ZMYND10_P329_F  | 3.8E+07 | NM_015896.2 | ZMYND10  | 51364  | 3  | 50358489  | -329 | Y | ATGGCTTCTTGGTCTCTATTTCTCG[CG]TCCCGGCTCCACTAGTTGGCTCTGA   | cg16621790 |
| ZNF264_P397_F   | 2225 | 0.80092 | 0.87251 | 0.04589 | ZNF264_P397_F   | 5.6E+07 | NM_003417.2 | ZNF264   | 9422   | 19 | 62394284  | -397 | Y | GGGATGTGAAAGGGGTCAGT[CG]CCAGGCGAGCTGAGGACCCAGTTC         | cg04803824 |

## **SUPPLEMENTARY METHODS**

### **Human cancer cell lines**

HCT-116 colon cancer cells and double DNMT1<sup>-/-</sup> and DNMT3B<sup>-/-</sup> (DKO) cells were grown as previously described<sup>1</sup>. HCT-116 cells were treated with 5-aza-2'-deoxycytidine (1  $\mu$ M) for 72 hours as previously described<sup>2</sup>. The DKO DNMT1/3B cell line was obtained by stably reintroducing the DNMT1 (cloned in a pCDNA3 vector (Life Technologies) with Zeocin resistance) and DNMT3B (cloned in a pIRES vector (Clontech) with Puromycin resistance) genes. The DNMT1 and DNMT3B levels of expression were checked by qRT-PCR (Supplementary Figure S1), and resembled those in the HCT-116 cell line. A western blot was performed to demonstrate that the observed expression came from the reintroduced DNMTs (Supplementary Figure S1). Nucleolin (Nucleolin Ab: Abcam, ab22758) was used as a control. Since the reintroduced DNMT1 and DNMT3B were marked with Flag and His-myc tags respectively, these antibodies (Flag Ab: Sigma-Aldrich, F3040; 6xHis Ab: Clontech, 631213) were used in the Western. The DKO DNMT1/3B cells were cultured in 1/400 Zeocin and 4.7 Puromycin concentrations.

### **DNA methylation analysis**

DNA methylation was determined by PCR analysis after bisulfite modification. Bisulfite genomic sequencing was carried out using the EZ DNA Methylation-Gold Kit<sup>TM</sup> (Zymo Research) according to the manufacturer's instructions. A minimum of eight colonies of each sequence and sample were automatically sequenced to determine the pattern of methylation, as previously described<sup>2</sup>. Bisulfite genomic-sequencing primers are shown in Supplementary Table S1.

### **Quantitative reverse-transcription PCR expression analysis**

RNA was isolated with TRIzol (Invitrogen) according to the manufacturer's instructions. Total RNA was then treated with DNase I (Ambion) and 1  $\mu$ g was retrotranscribed with Superscript II reverse transcriptase according to the manufacturer's instructions (Life Technologies). Real-time PCRs were performed in an Applied Biosystems 7900HT Fast Real-Time PCR System, using 40 ng of cDNA for each amplification. Expression values were normalized

with respect to *GAPDH* expression. Obtained values are expressed as fold change using the  $2^{-\Delta\Delta C_T}$  method<sup>3</sup>. Statistical significance was assessed with an ANOVA test (\*  $p < 0.05$ , \*\*  $p < 0.01$ , \*\*\*  $p < 0.001$ ). Reverse-transcription PCR primers were designed in different exons to prevent DNA amplification (Supplementary Table S1).

### **Semi-quantitative reverse-transcription PCR expression analysis**

RNA was isolated with TRIzol (Invitrogen) according to the manufacturer's instructions. Total RNA was then treated with DNase I (Ambion) and 1  $\mu$ g was retrotranscribed with Superscript II reverse transcriptase according to the manufacturer's instructions (Life Technologies). PCR amplifications were run in 2% agarose gels. Reverse-transcription PCR primers were the same as in the - quantitative reverse-transcription PCR expression analysis experiments (Supplementary Table S1).

### **Doubling time assay**

Cell doubling time assay was performed as previously described<sup>4</sup>. The assay was performed as follows: the same cell number was plated in 6 well plates by triplicate and left to grow for 72 hours counting the cells every 24 hours. Cells were trypsinized and counted using a Neubauer chamber at 24, 48 and 72 hours. The doubling time was calculated as follows: (in hours) =  $h \cdot \ln(2) / \ln(c_2/c_1)$ .

### **MTT**

Cell viability was determined by the 3-(4, 5-dimethyl-2-thiazolyl)-2, 5-diphenyl-2H-tetrazolium bromide (MTT) assay as previously described<sup>5</sup>. Briefly, 800 cells were plated onto 96-well plates. Cells were cultured for 7 days. Each day a plate was analyzed by adding MTT to a final concentration of 0.1%. After 2.5 hours incubation (37°C, 5% CO<sub>2</sub>), the MTT metabolic product, formazan was dissolved in DMSO and absorbance was measured at 570 nm.

### **Colony formation assay**

Colony formation assays were performed as previously described<sup>5</sup>. In our colony formation experiments,  $2 \times 10^3$  and  $1 \times 10^3$  cells were plated in 6 well

plates by triplicate and left to grow for 7 days. After that, cells were fixed and stained with MTT reagent.

### **In Vivo Nude Mouse Tumor-Growth Assay**

In Vivo Nude Mouse Tumor-Growth Assays were performed as previously described<sup>6</sup>. Athymic nu/nu mice (Harlam), aged 4-5 weeks, were used for tumor xenografts. The animals were maintained in a sterile environment; their cages, food and bedding were sterilized by autoclaving. Mice were anesthetized with isoflurane and tumor cells were subcutaneously (s.c.) injected.  $3.5 \times 10^6$  of empty vector cell line (control) or 2 stably transfected cell clones expressing SMYD3int were diluted in PBS with Matrigel™ (2:1) (Beckton-Dickinson), and injected s.c. (n=32 for HCT-116 and n=34 for DKO and DKO DNMT1/3B). Tumor dimensions were measured using digital calipers. Tumor volume (in mm<sup>3</sup>) was estimated according to the formula  $V = D \times d^2 / 2$ , where  $D$  is the long axis and  $d$  the short axis of tumor. All animal experiments were approved by the Bellvitge Biomedical Research Institute (IDIBELL) Animal Care and Use Committee.

### **Extraction of nuclei**

Nuclei were obtained as previously described<sup>7</sup>. Growing cells were trypsinized and washed twice with cold phosphate buffer saline (PBS). Cells were resuspended in 1 ml of ice-cold RSB adding Nonidet P40 to a concentration of 1% and kept on ice for 10 min. After incubation cells were centrifuged for 5 min at 800  $g$  at 4°C. The supernatant was discarded and nuclei were resuspended in RSB plus NP40. Samples were centrifuged for 5 min at 800  $g$  at 4°C. Nuclei were washed with RSB without NP40 and centrifuged for 5 min at 5 000 rpm at 4°C. A wash of NaCl 0.4 M was used to remove most non-histone-bound proteins from chromatin. The supernatant was discarded and the nuclei were resuspended in the corresponding buffer.

### ***MspI* accessibility assay**

*MspI* accessibility assays were performed as previously described<sup>7</sup>. Nuclei were resuspended in 1x *MspI* buffer to give  $10^6$  nuclei per 400  $\mu$ l. Nuclei from each cell line were digested in a series of increasing *MspI* restriction enzyme (Roche

Molecular Biochemicals) concentrations (0 U/ml, 100 U/ml and 400 U/ml) at 37°C for 1 hour. Reactions were stopped by adding 100 µl of stop solution (20 mM Tris-HCl pH 7.5, 0.6 M NaCl, 1% SDS, 10 mM EDTA and 400 µg/ml proteinase K) and incubating at 37°C for 2 hours. DNA was purified by phenol/chloroform extraction and ethanol precipitation. Amplicons were amplified and quantified through real-time PCR in an Applied Biosystems 7900HT Fast Real-Time PCR System. Results were normalized with respect to a region that does not have any *MspI* restriction site. The results shown are the means of at least three independent experiments amplifying each sample in triplicate. Statistical significance was assessed with an ANOVA test (\* p<0.05, \*\* p<0.01, \*\*\* p<0.001). PCR primers are shown in Supplementary Table S1.

### ***In vitro* methylation footprinting**

We adapted the methyltransferase-based single-promoter analysis assay protocol<sup>8</sup> for use with methylated sequences. We substituted SssI methyltransferase for *MspI*, *HaeIII* and *AluI* methyltransferases (New England Biolabs). Extracted nuclei (~10<sup>6</sup>) were incubated for 30 min first with 60 U of *HaeIII*, then with 60 U of *MspI* and finally with 60 U of *AluI* methyltransferases. A 1x PBS wash was done between incubations and nuclei were resuspended in the corresponding buffer. The final reaction was stopped by adding 100 µl of stop solution (20 mM Tris-HCl pH 7.5, 0.6 M NaCl, 1% SDS, 10 mM EDTA and 400 µg/ml proteinase K) and incubating at 37°C for 2 hours. DNA was purified by phenol/chloroform extraction and ethanol precipitation. Naked DNA was used as a positive control to check the efficiency of the methyltransferases.

### **Time course with 5-aza-2'-deoxycytidine treatment**

Sixteen different time points (until 192 hours) have been analyzed: six time points with continuous Aza treatment and ten time points after Aza withdrawal at 72 hours. Every 12 hours DNA methylation bisulfite genomic sequencing analysis, RNA expression and *MspI* accessibility assays for three regions of the *HOXD1* and *RARB* promoter CpG islands were performed. Cells were never allowed to reach confluence. DNA methylation data and *MspI* accessibility assays data have been plotted in a single graph in order to facilitate interpretation. Absolute value of 1 in DNA methylation represents the maximum



demethylation percentage achieved with the Aza treatment after analyzing eight bisulfite sequencing clones. Absolute value of 1 in DNA accessibility represents the maximum DNA accessibility achieved with the Aza treatment analyzed by *MspI* accessibility assay. The Y axis of the graphs depicts these absolute scaled values.

### **Obtaining nucleosomal DNA**

To prepare mononucleosomal DNA,  $10^6$  nuclei were resuspended in 500  $\mu$ l MNase buffer. Then, 500 U/mL of MNase (Roche) were added and tubes were incubated for 0.5–10 min at 37°C. The reaction was stopped by adding EDTA to a final concentration of 20 mM and SDS to a final concentration of 1%. The suspension was centrifuged at 14,000 rpm for 15 min. The supernatant containing the nuclease digested nuclei was incubated with 0.1 mg/mL proteinase K overnight at 37°C. DNA was treated with RNase, extracted with phenol/chloroform, precipitated with ethanol, and finally resuspended in TE (10 mM Tris-HCl, 1 mM EDTA at pH 8.0). The DNA obtained was run on an agarose gel to produce a nucleosomal DNA ladder. The mononucleosomal band, corresponding to a 147 bp band, was recovered from the gel and the DNA was purified.

### **DNA methylation and nucleosome positioning profiling using bead arrays**

Methylation was assessed using Illumina Goldengate Methylation Arrays<sup>®</sup>, as previously described<sup>9</sup>. Illumina Goldengate Methylation Arrays<sup>®</sup>, include 1,505 CpG sites located from -1,500 bp to +500 bp around the transcription start sites of 808 selected genes (Golden-Gate DNA methylation BeadArray, Illumina, Inc.). The panel of genes includes oncogenes and tumor-suppressor genes, imprinted genes, genes involved in various signaling pathways, and those responsible for DNA repair, cell cycle control, metastasis, differentiation, and apoptosis. Sixty-nine percent ( $n = 1,044$ ) of the 1,505 CpG sites studied are located within a canonical CpG island, while 31% ( $n = 461$ ) are situated outside CpG islands. In this work, genomic DNA from HCT-116 and DKO cell lines was hybridized, wherein all the sequences with a difference of at least 70% between the two cell lines were considered to be hypermethylated in HCT-116 (genomic HCT116 hybridization signal – genomic DKO hybridization signal  $\geq 0.7$ ). We

next determined which of the methylated sequences were protected from MNase digestion due to nucleosome occupancy. The hybridization results of HCT116 mononucleosomic DNA were compared with DKO genomic DNA hybridization results, the sequences with an enrichment of 70% in the hybridization signal being considered to be protected (mononucleosomal HCT-116 hybridization signal – genomic DKO hybridization signal  $\geq 0.7$ ).

### **Quantitative chromatin immunoprecipitation**

Chromatin immunoprecipitation assays were performed as previously described<sup>10</sup>. Fixation was performed with 1% formaldehyde and sonication with Bioruptor (Diagenode, Liede, Belgium) was optimized to obtain 250–500 bp chromatin fragments. Each chromatin extract was immunoprecipitated with 2  $\mu$ g of total H3 (Rb Abcam1791). Non-related Rabbit IgG (Diagenode, kch-504-250) antibody was used as a negative control. Total DNA collected after sonication (input fraction) was used as positive control. Quantitative real-time PCR was performed in an Applied Biosystems 7900HT Fast Real-Time PCR System with specific primers for each of the analyzed promoters (Supplementary Table S1).

### **REFERENCES**

1. Rhee I, Bachman KE, Park BH, Jair KW, Yen RW, Schuebel KE *et al*. DNMT1 and DNMT3b cooperate to silence genes in human cancer cells. *Nature* 2002; **416**: 552-6.
2. Jacinto FV, Ballestar E, Ropero S and Esteller M. Discovery of epigenetically silenced genes by methylated DNA immunoprecipitation in colon cancer cells. *Cancer Res* 2007; **67**: 11481-6.
3. Livak KJ and Schmittgen TD. Analysis of relative gene expression data using real-time quantitative PCR and the 2(-Delta Delta C(T)) Method. *Methods* 2001; **25**: 402–408.
4. Melo SA, Ropero S, Moutinho C, Aaltonen LA, Yamamoto H, Calin GA *et al*. A TARBP2 mutation in human cancer impairs microRNA processing and DICER1 function. *Nat Genet* 2009; **41**:365-370.
5. Melo S, Villanueva A, Moutinho C, Davalos V, Spizzo R, Ivan C *et al*. Small molecule enoxacin is a cancer-specific growth inhibitor that acts by

enhancing TAR RNA-binding protein 2-mediated microRNA processing. *Proc Natl Acad Sci U S A* 2011; **108**:4394-9.

6. Guil S, Soler M, Portela A, Carrère J, Fonalleras E, Gómez A et al. Intronic RNAs mediate EZH2 regulation of epigenetic targets. *Nat Struct Mol Biol* 2012; **19**:664-70.
7. Lujambio A, Portela A, Liz J, Melo SA, Rossi S, Spizzo R et al. CpG island hypermethylation-associated silencing of non-coding RNAs transcribed from ultraconserved regions in human cancer. *Oncogene* 2010; **29**:6390-401.
8. Fatemi M, Pao MM, Jeong S, Gal-Yam EN, Egger G, Weisenberger DJ et al. Footprinting of mammalian promoters: use of a CpG DNA methyltransferase revealing nucleosome positions at a single molecule level. *Nucleic Acids Res* 2005; **33**:e176.
9. Fernandez AF, Assenov Y, Martin-Subero JI, Balint B, Siebert R, Taniguchi H et al. A DNA methylation fingerprint of 1628 human samples. *Genome Res* 2012; **22**:407-19.
10. Lopez-Serra L, Ballestar E, Ropero S, Setien F, Billard LM, Fraga MF et al. Unmasking of epigenetically silenced candidate tumor suppressor genes by removal of methyl-CpG-binding domain proteins. *Oncogene* 2008; **27**:3556-66.
